# Supplementary material for: Discovery of 7-hydroxyaporphines as conformationally restricted ligands for beta-1 and beta-2 adrenergic receptors
Source: Royal Society of Chemistry journal article supplement (doi:10.1039/c7md00656j), 2018-01-01
Supplement: c7md00656j1.pdf [file c7md00656j1.pdf]

***Electronic Supplementary Information***

**Discovery of 7-hydroxyaporphines as conformational restricted  
ligands for beta-1 and beta-2 adrenergic receptors†**

**Angela F. Ku and Gregory D. Cuny<sup>a</sup>**

<sup>a</sup> Department of Pharmacological and Pharmaceutical Sciences, University of Houston, Science  
and Research Building 2, Houston, Texas 77204, United States.

**Content**

|                                                                 |         |
|-----------------------------------------------------------------|---------|
| 1. General Experimental Conditions                              | S2      |
| 2. Functional Assays                                            | S3–S4   |
| 3. Synthetic Procedures                                         | S5–S15  |
| 4. Copies of the <sup>1</sup> H and <sup>13</sup> C NMR spectra | S16–S33 |

## 1. General Experimental Conditions

All reactions involving air-sensitive reagents were carried out in oven-dried glassware equipped with a magnetic stir bar and fitted with rubber septa under argon unless otherwise stated. All commercially available chemicals and reagent grade solvents were used directly without further purification unless otherwise specified. All reactions were monitored by thin-layer chromatography (TLC) on Baker-flex<sup>®</sup> silica gel plates (IB2-F) using UV-light (254 and 365 nm) detection or visualizing agents (ninhydrin or phosphomolybdic acid stain). Flash column chromatography was conducted on silica gel (230–400 mesh) using Teledyne Isco CombiFlash<sup>®</sup> Rf. Melting points were measured using a Thomas Hoover Uni-Melt capillary melting point apparatus and are uncorrected. NMR spectra were recorded at room temperature using a JEOL ECA-500 (<sup>1</sup>H NMR at 500 MHz and <sup>13</sup>C NMR at 125 MHz) or a JEOL ECX-400P (<sup>1</sup>H NMR at 400 MHz and <sup>13</sup>C NMR at 100 MHz) with tetramethylsilane (TMS) as an internal standard. Chemical shifts ( $\delta$ ) are given in parts per million (ppm) with reference to solvent signals [<sup>1</sup>H-NMR: CDCl<sub>3</sub> (7.26 ppm), CD<sub>3</sub>OD (3.31 ppm), DMSO-*d*<sub>6</sub> (2.50 ppm); <sup>13</sup>C-NMR: CDCl<sub>3</sub> (77.0 ppm), CD<sub>3</sub>OD (49.15 ppm), DMSO-*d*<sub>6</sub> (39.51 ppm)]. Signal patterns are reported as s (singlet), d (doublet), t (triplet), q (quartet), m (multiplet) and br (broad). Coupling constants (*J*) are given in Hz. High resolution mass spectra (HRMS) were performed by the University of Texas Mass Spectrometry facility using a quadrupole time-of-flight (Q-TOF) mass spectrometer with electrospray ionization (ESI). The spectra were reported as *m/z* (relative intensity) for the molecular ion [M]. Optical rotations were measured on ATAGO's polarimeter (POLAX-2L). Specific rotation [ $\alpha$ ]<sub>D</sub> values are given in units of 10<sup>-1</sup> deg cm<sup>2</sup> g<sup>-1</sup>.

## 2. Functional Assays

The functional assays were conducted by Eurofins Panlab Discovery Service. Compound **2** was tested for both agonist and antagonist activities of the adrenergic receptor subtypes  $\beta_1$  and  $\beta_2$  using conditions described in Table S1. For functional antagonism, the  $\beta_1$ -adrenergic receptor was first agonized with isoproterenol to release cAMP. The agonism, detected by cAMP accumulation, was subsequently blocked through the treatment with either compound **2** ( $IC_{50} = 0.017 \pm 0.014 \mu M$ ) or the positive control, atenolol ( $IC_{50} = 0.40 \pm 0.003 \mu M$ ) as shown in Figure S1. Following a similar protocol, **2** and the positive control, ICI-118,551, inhibited the procaterol-induced cAMP increase at the  $\beta_2$ -adrenergic receptor with  $IC_{50}$  values of  $0.0069 \pm 0.0027 \mu M$  and  $0.00067 \pm 0.00012 \mu M$ , respectively (Figure S2). In the absence of  $\beta_1$  or  $\beta_2$  agonists, compound **2** had no effect.

**Table S1.** Methods for  $\beta_1$  and  $\beta_2$ -adrenergic receptor functional assays

|                      | Adrenergic $\beta_1$ , adenylyl cyclase              | Adrenergic $\beta_2$ , adenylyl cyclase              |
|----------------------|------------------------------------------------------|------------------------------------------------------|
| Target               | Human CHO-K1 cells                                   | Human CHO cells                                      |
| Quantitation method  | HTRF quantitation of cAMP accumulation               | HTRF quantitation of cAMP accumulation               |
| Vehicle              | 0.40% DMSO                                           | 0.40% DMSO                                           |
| Incubation time/temp | 15 minutes @ 37°C                                    | 20 minutes @ 37°C                                    |
| Incubation buffer    | HBSS, 5 mM HEPES, 0.1% BSA, 100 $\mu M$ IBMX, pH 7.4 | HBSS, 5 mM HEPES, 0.1% BSA, 100 $\mu M$ IBMX, pH 7.4 |

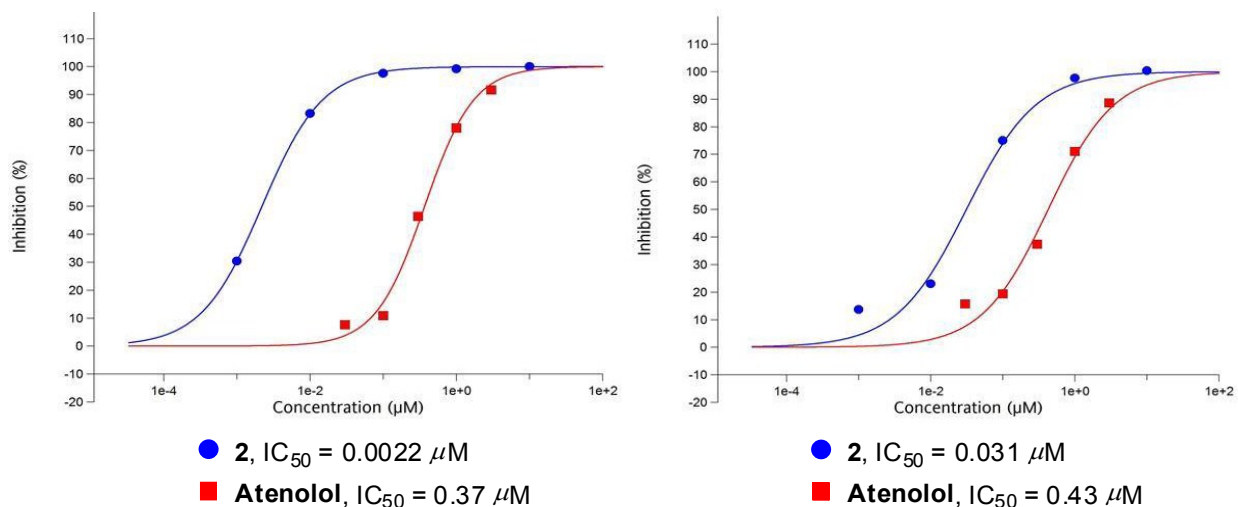

**Figure S1.** Dose-response curves of **2** and atenolol (positive control) for inhibition of isoproterenol-induced cAMP increase in a  $\beta_1$ -adrenergic receptor functional assay.

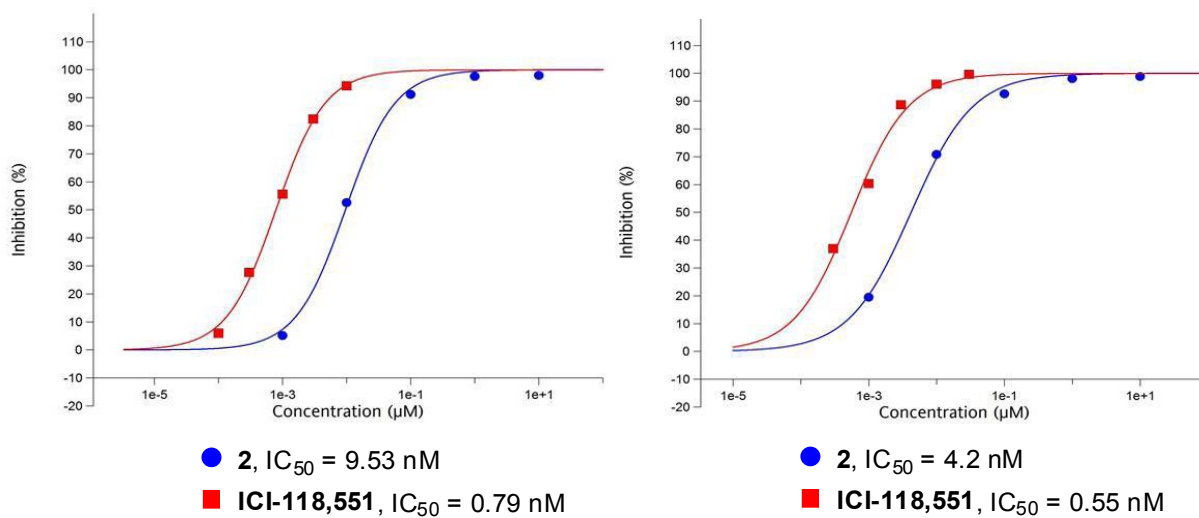

**Figure S2.** Dose-response curves of **2** and ICI-118,551 (positive control) for inhibition of isoproterenol-induced cAMP increase in a  $\beta_2$ -adrenergic receptor functional assay.

### 3. Synthetic Procedures

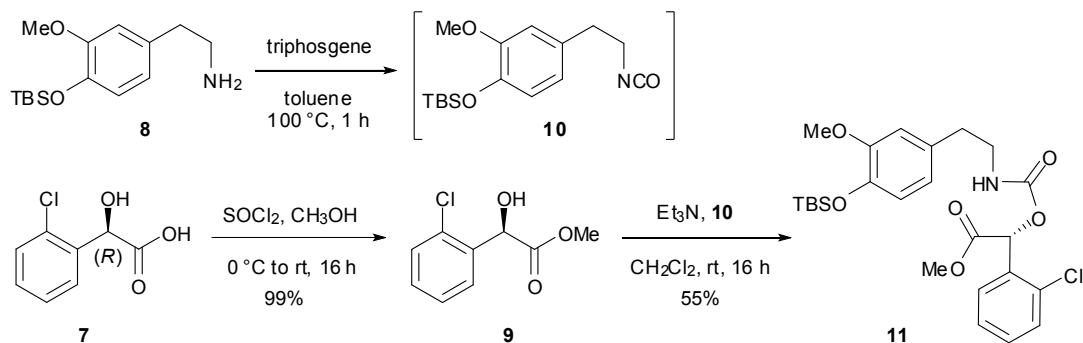

**Methyl (R)-2-(2-chlorophenyl)-2-hydroxyacetate (9)** To a solution of (R)-(-)-2-chloromandelic acid (**7**) (7.38 g, 39.5 mmol) in CH<sub>3</sub>OH (15 mL) was added SOCl<sub>2</sub> (3.2 mL, 44 mmol) at 0 °C under argon. After being stirred at room temperature for 16 h, the reaction mixture was poured into saturated aqueous NaHCO<sub>3</sub> (100 mL). The mixture was then evaporated *in vacuo* to remove CH<sub>3</sub>OH. The aqueous layer was extracted with EtOAc (2 × 50 mL), and the combined organic extracts were washed with brine, dried over anhydrous Na<sub>2</sub>SO<sub>4</sub>, filtered and concentrated to afford **9** (7.9 g, 99%) as a colorless oil; <sup>1</sup>H NMR (CDCl<sub>3</sub>, 500 MHz) 7.40–7.39 (2 H, m), 7.29–7.27 (2 H, m), 5.57 (1 H, s), 3.78 (3 H, s); <sup>13</sup>C NMR (CDCl<sub>3</sub>, 125 MHz) 173.7, 135.9, 133.5, 130.0, 129.8, 128.8, 127.2, 70.3, 53.2; HRMS (ESI/Q-TOF) *m/z* [M + Na]<sup>+</sup> calculated for C<sub>9</sub>H<sub>9</sub>ClO<sub>3</sub>Na 223.0132; found 223.0132. The crude product was used directly in the next step.

**Methyl (R)-2-(((4-((tert-butyldimethylsilyloxy)-3-methoxyphenethyl)carbamoyloxy)-2-chlorophenyl)acetate (11)** To a solution of triphosgene (630 mg, 2.1 mmol) in anhydrous toluene (5 mL) was added a solution of **8** (850 mg, 3.0 mmol) in anhydrous toluene (5 mL) under argon. The mixture was stirred at room temperature for 30 min and heated to 100 °C for another 1 h. The resulting mixture was then allowed to cool to room temperature and slowly added into a suspension of **9** (400 mg, 2.0 mmol) and triethylamine (340 μL, 2.4 mmol) in anhydrous CH<sub>2</sub>Cl<sub>2</sub> (5 mL) under argon. After being stirred at room temperature for 16 h, the reaction was quenched by the addition of saturated aqueous NH<sub>4</sub>Cl, evaporated *in vacuo* to remove excess toluene and CH<sub>2</sub>Cl<sub>2</sub>, and then partitioned between H<sub>2</sub>O and EtOAc. Following neutralization with saturated aqueous NaHCO<sub>3</sub>, the organic layer was washed with brine, dried over anhydrous Na<sub>2</sub>SO<sub>4</sub>, filtered and concentrated. The residue was purified by column chromatography on silica gel (EtOAc/hexane, 5:95 to 7:93 to 10:90) to afford **11** (560 mg, 55%) as a colorless oil; [α]<sub>D</sub><sup>24</sup> –67 (*c* 1.5, CHCl<sub>3</sub>); <sup>1</sup>H NMR (CDCl<sub>3</sub>, 500 MHz) 7.43–7.40 (2 H, m), 7.33–7.27 (2 H, m), 6.76 (1 H, d, *J* = 8.0 Hz), 6.67 (1 H, d, *J* = 2.0 Hz), 6.62 (1 H, dd, *J* = 8.0, 2.0 Hz), 6.45 (1 H, s), 4.98 (1H,

br, NH), 3.77 (3 H, s), 3.75 (3 H, s), 3.46–3.42 (2 H, m), 2.75 (2 H, t,  $J = 7.0$  Hz), 0.99 (9 H, s), 0.14 (6 H, s);  $^{13}\text{C}$  NMR ( $\text{CDCl}_3$ , 125 MHz) 169.6, 155.0, 150.9, 143.6, 134.1, 132.5, 131.8, 130.4, 129.9, 129.4, 127.1, 120.9, 120.8, 112.6, 71.2, 55.4, 52.7, 42.5, 35.5, 25.7 (3  $\times$ ), 18.4, –4.7 (2  $\times$ ); HRMS (ESI/Q-TOF)  $m/z$   $[\text{M} + \text{Na}]^+$  calculated for  $\text{C}_{25}\text{H}_{34}\text{ClINO}_6\text{SiNa}$  530.1736; found 530.1740.

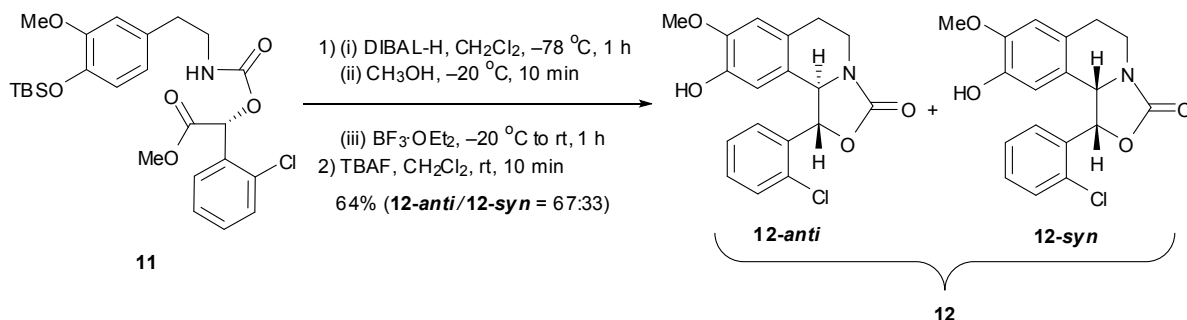

To a solution of **11** (308 mg, 0.61 mmol) in anhydrous  $\text{CH}_2\text{Cl}_2$  (10 mL) was added dropwise a solution of DIBAL-H (25% in toluene, 800  $\mu\text{L}$ , 1.2 mmol) at  $-78^\circ\text{C}$  under argon, and the mixture was stirred at  $-78^\circ\text{C}$  for 1 h. Then,  $\text{CH}_3\text{OH}$  (500  $\mu\text{L}$ ) was added, and the reaction was stirred at  $-20^\circ\text{C}$  for 10 min. Following the addition of  $\text{BF}_3\cdot\text{OEt}_2$  (740  $\mu\text{L}$ , 6 mmol), the resulting mixture was stirred at room temperature for another 1 h. This reaction mixture was quenched with  $\text{H}_2\text{O}$  (5 mL), evaporated *in vacuo* to remove excess  $\text{CH}_3\text{OH}$ , and then partitioned between  $\text{H}_2\text{O}$  and EtOAc. After neutralization with saturated aqueous  $\text{NaHCO}_3$ , the organic layer was washed with brine, dried over anhydrous  $\text{Na}_2\text{SO}_4$ , filtered and concentrated. To the crude mixture in anhydrous  $\text{CH}_2\text{Cl}_2$  (5 mL) was added TBAF (1.0 M in THF, 470  $\mu\text{L}$ , 4.7 mmol) under argon. After being stirred at room temperature for 10 min, the reaction was evaporated *in vacuo*. The residue was purified by column chromatography on silica gel (EtOAc/hexane, 30:70 to 40:60) to afford **12** (132 mg, 64%) as a mixture of diastereomers (*dr* 67:33 for the *anti/syn* isomers). *Anti*-isomer **12-anti** could be obtained after several recrystallizations with EtOAc and hexane.

**(1*R*,10*bR*)-1-(2-Chlorophenyl)-9-hydroxy-8-methoxy-5,6-dihydro-1*H*-oxazolo[4,3-**

***a*]**isoquinolin-3(10*bH*)-one (**12-anti**) White prisms; mp  $87\text{--}89^\circ\text{C}$ ;  $[\alpha]_D^{26} -60$  ( $c$  2.4,  $\text{CHCl}_3$ );  $^1\text{H}$  NMR ( $\text{CDCl}_3$ , 500 MHz) 7.55 (1 H, dd,  $J = 7.0, 2.5$  Hz), 7.47–7.46 (1 H, m), 7.40–7.34 (2 H, m), 6.89 (1 H, s), 6.61 (1 H, s), 5.73 (1 H, d,  $J = 4.5$  Hz), 5.66 (1 H, s, PhOH), 4.82 (1 H, d,  $J = 4.5$  Hz), 4.11 (1 H, ddd,  $J = 13.0, 6.0, 1.5$  Hz), 3.88 (3 H, s), 3.20 (1 H, td,  $J = 13.0, 4.0$  Hz), 3.10 (1 H, td,  $J = 16.0, 6.0$  Hz), 2.61 (1 H, dd,  $J = 16.0, 4.0$  Hz);  $^{13}\text{C}$  NMR ( $\text{CDCl}_3$ , 125 MHz) 157.6, 146.2, 144.7, 135.7, 132.3, 130.2, 130.2, 128.1, 127.5, 126.3, 125.5, 111.2, 110.9, 79.4, 61.4, 55.9, 39.4, 26.8; HRMS (ESI/Q-TOF)  $m/z$   $[\text{M} + \text{H}]^+$  calculated for  $\text{C}_{18}\text{H}_{17}\text{ClINO}_4$  346.0841;

found 346.0840.

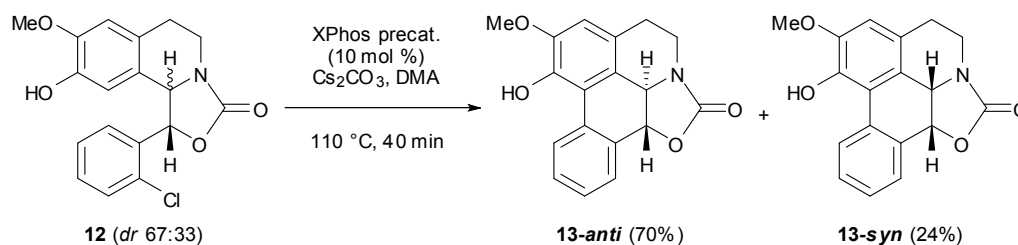

To **12** (*dr* 67:33) (39 mg, 0.11 mmol), Cs<sub>2</sub>CO<sub>3</sub> (111 mg, 0.34 mmol) and XPhos precatalyst (8 mg, 0.011 mmol) was added anhydrous DMA (500  $\mu$ L) under argon. The reaction was stirred at room temperature for 5 min and then put into a preheated oil bath (110  $^{\circ}$ C) for another 40 min. After being quenched by the addition of 1 N HCl<sub>(aq)</sub>, the aqueous layer was extracted with EtOAc (2  $\times$  30 mL). Following neutralization with saturated aqueous NaHCO<sub>3</sub>, the combined organic extracts were washed with brine, dried over anhydrous Na<sub>2</sub>SO<sub>4</sub>, filtered and concentrated. The residue was purified by column chromatography on silica gel (EtOAc/hexane, 25:75 to 30:70 to 35:65 to 50:50) to afford **13-anti** (24 mg, 70%) and **13-syn** (8 mg, 24%) in a combined yield of 94%.

**(3<sup>1</sup>R,12bR)-8-Hydroxy-7-methoxy-3<sup>1</sup>,4,5,12b-tetrahydro-2H-dibenzo[de,g]oxazolo[5,4,3-*ij*]quinolin-2-one (13-anti)** White prisms; **mp** 218–219  $^{\circ}$ C; [ $\alpha$ ]<sub>D</sub><sup>25</sup> –103 (*c* 0.97, CHCl<sub>3</sub>); <sup>1</sup>H NMR (CDCl<sub>3</sub>, 500 MHz) 8.39 (1 H, d, *J* = 8.0 Hz), 7.47 (1 H, d, *J* = 7.5 Hz), 7.43 (1 H, t, *J* = 8.0 Hz), 7.35 (1 H, t, *J* = 7.5 Hz), 6.68 (1 H, s), 6.34 (1 H, s, PhOH), 4.79 (1 H, d, *J* = 13.0 Hz), 4.17 (1 H, d, *J* = 13.0 Hz), 4.01–3.97 (1 H, m), 3.94 (3 H, s), 3.47–3.42 (1 H, m), 3.04–2.97 (1 H, m), 2.94–2.90 (1 H, m); <sup>13</sup>C NMR (CDCl<sub>3</sub>, 125 MHz) 157.8, 147.3, 142.7, 133.5, 130.4, 129.6, 127.8, 127.7, 121.9, 121.3, 120.1, 116.0, 109.5, 81.6, 56.5, 56.2, 37.8, 26.7; **HRMS** (ESI/Q-TOF) *m/z* [M + H]<sup>+</sup> calculated for C<sub>18</sub>H<sub>16</sub>NO<sub>4</sub> 310.1074; found 310.1079.

**(3<sup>1</sup>S,12bR)-8-Hydroxy-7-methoxy-3<sup>1</sup>,4,5,12b-tetrahydro-2H-dibenzo[de,g]oxazolo[5,4,3-*ij*]quinolin-2-one (13-syn)** White prisms; **mp** 237–239  $^{\circ}$ C; [ $\alpha$ ]<sub>D</sub><sup>24</sup> –80 (*c* 0.5, CHCl<sub>3</sub>); <sup>1</sup>H NMR (CDCl<sub>3</sub>, 500 MHz) 8.78 (1 H, d, *J* = 8.0 Hz), 7.54–7.50 (2 H, m), 7.35 (1 H, td, *J* = 7.5, 1.0 Hz), 6.76 (1 H, s), 6.45 (1 H, s, PhOH), 5.56 (1 H, d, *J* = 7.0 Hz), 4.70 (1 H, d, *J* = 7.0 Hz), 3.95 (3 H, s), 3.67 (1 H, dd, *J* = 11.0, 7.5 Hz), 3.52 (1 H, td, *J* = 11.0, 6.5 Hz), 2.92–2.80 (2 H, m); <sup>13</sup>C NMR (CDCl<sub>3</sub>, 125 MHz) 160.4, 146.9, 142.6, 132.1 (2  $\times$ ), 130.7, 129.1, 127.7, 126.9, 126.5, 123.6, 115.8, 110.1, 73.2, 56.5, 52.6, 40.4, 27.1; **HRMS** (ESI/Q-TOF) *m/z* [M + Na]<sup>+</sup> calculated for C<sub>18</sub>H<sub>15</sub>NO<sub>4</sub>Na 332.0893; found 332.0895.

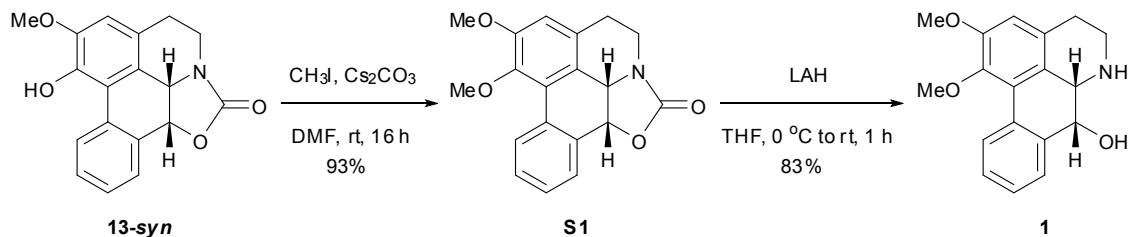

**(3<sup>1</sup>*S*,12*bR*)-7,8-Dimethoxy-3<sup>1</sup>,4,5,12*b*-tetrahydro-2*H*-dibenzo[*de,g*]oxazolo[5,4,3-*ij*]quinolin-2-one (S1)** To a solution of **13-syn** (64 mg, 0.20 mmol) and Cs<sub>2</sub>CO<sub>3</sub> (82 mg, 0.25 mmol) in anhydrous DMF (1 mL) was added CH<sub>3</sub>I (16  $\mu$ L, 0.25 mmol) under argon, and the mixture was stirred at room temperature for 16 h. After being quenched with H<sub>2</sub>O (10 mL), the aqueous layer was extracted with EtOAc (2  $\times$  20 mL). The combined organic extracts were washed with brine, dried over anhydrous Na<sub>2</sub>SO<sub>4</sub>, filtered and concentrated. The residue was purified by column chromatography on silica gel (EtOAc/CH<sub>2</sub>Cl<sub>2</sub>, 0:100 to 2:98) to afford **S1** (62 mg, 93%) as a white solid; **mp** 236–237  $^{\circ}$ C; [ $\alpha$ ]<sub>D</sub><sup>24</sup> –78 (*c* 1.4, CHCl<sub>3</sub>); **<sup>1</sup>H NMR** (CDCl<sub>3</sub>, 500 MHz) 8.77 (1 H, d, *J* = 8.0 Hz), 7.53–7.49 (2 H, m), 7.38–7.35 (1 H, m), 6.80 (1 H, s), 5.51 (1 H, d, *J* = 7.5 Hz), 4.67 (1 H, d, *J* = 7.5 Hz), 3.91 (3 H, s), 3.72 (3 H, s), 3.69–3.65 (1 H, m), 3.58–3.52 (1 H, m), 2.93–2.81 (2 H, m); **<sup>13</sup>C NMR** (CDCl<sub>3</sub>, 125 MHz) 160.4, 153.7, 146.0, 132.2, 131.9, 131.5, 131.1, 128.7, 128.2, 127.3, 123.4, 123.0, 112.1, 73.1, 60.2, 56.0, 52.5, 40.4, 27.3; **HRMS** (ESI/Q-TOF) *m/z* [M + Na]<sup>+</sup> calculated for C<sub>19</sub>H<sub>17</sub>NO<sub>4</sub>Na 346.1050; found 346.1056.

**(6*aS*,7*R*)-1,2-Dimethoxy-5,6,6*a*,7-tetrahydro-4*H*-dibenzo[*de,g*]quinolin-7-ol (1)** To a solution of **S1** (17 mg, 0.053 mmol) in THF (3 mL) was added a solution of lithium aluminum hydride (LAH) (1.0 M in THF, 260  $\mu$ L) at 0  $^{\circ}$ C under argon, and the mixture was stirred at room temperature for 1 h. After being quenched with saturated aqueous sodium potassium tartrate (5 mL) for 30 min, the aqueous layer was extracted with CH<sub>2</sub>Cl<sub>2</sub> (2  $\times$  10 mL). Following neutralization with saturated aqueous NaHCO<sub>3</sub>, the combined organic extracts were washed with brine, dried over anhydrous Na<sub>2</sub>SO<sub>4</sub>, filtered and concentrated. The residue was purified by column chromatography on silica gel (CH<sub>3</sub>OH/CH<sub>2</sub>Cl<sub>2</sub>, 5:95 to 10:90) to afford **1** (13 mg, 83%) as a pale yellow solid; **mp** 81–82  $^{\circ}$ C; [ $\alpha$ ]<sub>D</sub><sup>22</sup> –145 (*c* 1.1, CHCl<sub>3</sub>); **<sup>1</sup>H NMR** (CDCl<sub>3</sub>, 500 MHz) 8.50 (1 H, d, *J* = 7.0 Hz), 7.43 (1 H, td, *J* = 7.0, 1.5 Hz), 7.38 (1 H, dd, *J* = 7.5, 1.0 Hz), 7.29 (1 H, td, *J* = 7.5, 1.5 Hz), 6.66 (1 H, s), 4.54 (1 H, d, *J* = 2.5 Hz), 3.97 (1 H, s), 3.89 (3 H, s), 3.69 (3 H, s), 3.42 (1 H, dd, *J* = 12.0, 5.0 Hz), 3.13 (1 H, td, *J* = 12.0, 4.0 Hz), 2.99 (1 H, td, *J* = 16.0, 5.0 Hz), 2.70 (1 H, dd, *J* = 16.0, 4.0 Hz); **<sup>13</sup>C NMR** (CDCl<sub>3</sub>, 125 MHz) 152.4, 145.2, 136.3, 131.3, 131.3, 129.4, 129.0, 128.9, 127.8, 125.6, 123.4, 112.1, 71.1, 60.2, 57.1, 55.8, 42.8, 29.0; **HRMS** (ESI/Q-TOF) *m/z* [M + H]<sup>+</sup> calculated for C<sub>18</sub>H<sub>20</sub>NO<sub>3</sub> 298.1438; found 298.1439.



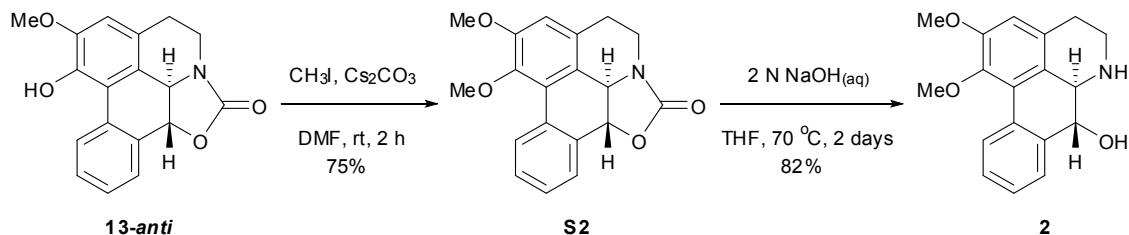

**(3<sup>1R</sup>,12b<sup>R</sup>)-7,8-Dimethoxy-3<sup>1</sup>,4,5,12b-tetrahydro-2H-dibenzo[de,g]oxazolo[5,4,3-ij]quinolin-2-one (S2)** To a solution of **13-anti** (18 mg, 0.058 mmol) and Cs<sub>2</sub>CO<sub>3</sub> (23 mg, 0.07 mmol) in anhydrous DMF (0.5 mL) was added CH<sub>3</sub>I (5 μL, 0.07 mmol) under argon, and the mixture was stirred at room temperature for 2 h. After being quenched with H<sub>2</sub>O (5 mL), the aqueous layer was extracted with EtOAc (2 × 20 mL). The combined organic extracts were washed with brine, dried over anhydrous Na<sub>2</sub>SO<sub>4</sub>, filtered and concentrated. The residue was purified by column chromatography on silica gel (EtOAc/hexane, 20:80 to 25:75) to afford **S2** (14 mg, 75%) as a white solid; **mp** 196–197 °C; [α]<sup>23</sup><sub>D</sub> –70 (*c* 1.0, CHCl<sub>3</sub>); <sup>1</sup>H NMR (CDCl<sub>3</sub>, 500 MHz) 8.40 (1 H, dd, *J* = 7.0, 1.5 Hz), 7.48 (1 H, d, *J* = 7.0 Hz), 7.44–7.37 (2 H, m), 6.76 (1 H, s), 4.82 (1 H, d, *J* = 13.5 Hz), 4.16 (1 H, d, *J* = 13.5 Hz), 4.03–3.98 (1 H, m), 3.91 (3 H, s), 3.75 (3 H, s), 3.49–3.44 (1 H, m), 3.07–2.94 (2 H, m); <sup>13</sup>C NMR (CDCl<sub>3</sub>, 125 MHz) 157.7, 153.7, 146.5, 134.0, 130.2, 129.6, 128.2, 128.1, 125.0, 123.7, 121.7, 121.3, 111.6, 81.5, 60.4, 56.2, 56.1, 37.7, 27.0; **HRMS** (ESI/Q-TOF) *m/z* [M + H]<sup>+</sup> calculated for C<sub>19</sub>H<sub>18</sub>NO<sub>4</sub> 324.1230; found 324.1235.

**(6a<sup>R</sup>,7<sup>R</sup>)-1,2-Dimethoxy-5,6,6a,7-tetrahydro-4H-dibenzo[de,g]quinolin-7-ol (2)** To a solution of **S2** (10 mg, 0.031 mmol) in THF (2 mL) was added 2 N NaOH<sub>(aq)</sub> (1 mL), and the mixture was stirred at 70 °C for 2 days. After being quenched with H<sub>2</sub>O (10 mL), the aqueous layer was extracted with EtOAc (2 × 20 mL). The combined organic extracts were washed with brine, dried over anhydrous Na<sub>2</sub>SO<sub>4</sub>, filtered and concentrated. The residue was purified by column chromatography on silica gel (CH<sub>3</sub>OH/CH<sub>2</sub>Cl<sub>2</sub>, 5:95 to 10:90) to afford **2** (7.6 mg, 82%) as a pale yellow solid; **mp** 89–91 °C; [α]<sup>24</sup><sub>D</sub> +78 (*c* 0.58, CHCl<sub>3</sub>); <sup>1</sup>H NMR (CDCl<sub>3</sub>, 500 MHz) 8.37–8.35 (1 H, m), 7.73–7.72 (1 H, m), 7.38–7.33 (2 H, m), 6.65 (1 H, s), 4.55 (1 H, d, *J* = 11.5 Hz), 3.88 (3 H, s), 3.67 (1 H, d, *J* = 11.5 Hz), 3.64 (3 H, s), 3.40–3.37 (1 H, m), 3.10–3.03 (1 H, m), 2.98 (1 H, td, *J* = 11.5, 3.5 Hz), 2.73 (1 H, d, *J* = 16.0 Hz); <sup>13</sup>C NMR (CDCl<sub>3</sub>, 125 MHz) 152.5, 145.1, 139.0, 130.2, 129.4, 128.1, 127.8, 127.4, 125.9, 124.3, 123.1, 111.8, 72.0, 60.3, 59.0, 55.9, 42.0, 28.9; **HRMS** (ESI/Q-TOF) *m/z* [M + H]<sup>+</sup> calculated for C<sub>18</sub>H<sub>20</sub>NO<sub>3</sub> 298.1438; found 298.1440.

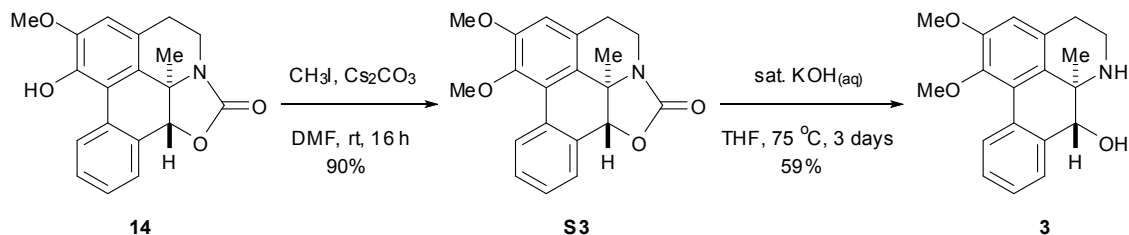

***rel*-(3<sup>1</sup>*S*,12*bS*)-7,8-Dimethoxy-3<sup>1</sup>-methyl-3<sup>1</sup>,4,5,12*b*-tetrahydro-2*H*-**

**dibenzo[*de,g*]oxazolo[5,4,3-*ij*]quinolin-2-one (S3)** To a solution of **14** (22 mg, 0.068 mmol) and Cs<sub>2</sub>CO<sub>3</sub> (26 mg, 0.08 mmol) in anhydrous DMF (1 mL) was added CH<sub>3</sub>I (5 μL, 0.08 mmol) under argon, and the mixture was stirred at room temperature for 16 h. After being quenched with H<sub>2</sub>O (10 mL), the aqueous layer was extracted with EtOAc (2 × 20 mL). The combined organic extracts were washed with brine, dried over anhydrous Na<sub>2</sub>SO<sub>4</sub>, filtered and concentrated. The residue was purified by column chromatography on silica gel (EtOAc/hexane, 20:80 to 25:75) to afford **S3** (20.7 mg, 90%) as a pale yellow foam; <sup>1</sup>H NMR (CDCl<sub>3</sub>, 500 MHz) 8.37 (1 H, d, *J* = 8.5 Hz), 7.44–7.37 (3 H, m), 6.74 (1 H, s), 5.07 (1 H, s), 3.92–3.87 (4 H, m), 3.73 (3 H, s), 3.61 (1 H, dt, *J* = 12.5, 7.5 Hz), 3.02–2.99 (2 H, m), 0.95 (3 H, s); <sup>13</sup>C NMR (CDCl<sub>3</sub>, 125 MHz) 157.2, 153.4, 146.7, 132.6, 130.7, 129.3, 128.2, 128.1, 127.9, 124.6, 123.2, 121.9, 111.7, 84.3, 60.4, 56.3, 56.1, 36.2, 26.6, 16.6; HRMS (ESI/Q-TOF) *m/z* [M + H]<sup>+</sup> calculated for C<sub>20</sub>H<sub>20</sub>NO<sub>4</sub> 338.1387; found 338.1390.

***rel*-(6*aS*,7*S*)-1,2-Dimethoxy-6*a*-methyl-5,6,6*a*,7-tetrahydro-4*H*-dibenzo[*de,g*]quinolin-7-ol (3)**

To a solution of **S3** (22 mg, 0.065 mmol) in THF (1 mL) was added saturated KOH<sub>(aq)</sub> (1 mL), and the mixture was stirred at 75 °C for 3 days. After being quenched with H<sub>2</sub>O (10 mL), the aqueous layer was extracted with EtOAc (2 × 20 mL). The combined organic extracts were washed with brine, dried over anhydrous Na<sub>2</sub>SO<sub>4</sub>, filtered, and concentrated. The residue was purified by column chromatography on silica gel (CH<sub>3</sub>OH/CH<sub>2</sub>Cl<sub>2</sub>, 5:95 to 10:90) to afford **3** (12 mg, 59%) as a white solid; mp > 250 °C (decomposed); <sup>1</sup>H NMR (CD<sub>3</sub>OD, 400 MHz) 8.36–8.33 (1 H, m), 7.64–7.62 (1 H, m), 7.45–7.38 (2 H, m), 6.90 (1 H, s), 4.90 (1 H, s), 3.90 (3 H, s), 3.65 (3 H, s), 3.58–3.50 (2 H, m), 3.28–3.20 (1 H, m), 3.13–3.07 (1 H, m), 1.17 (3 H, s); <sup>13</sup>C NMR (CD<sub>3</sub>OD, 100 MHz) 155.3, 147.5, 138.9, 131.1, 129.6 (2 ×), 129.1, 127.4, 126.4, 125.6, 125.3, 113.5, 74.0, 60.9, 60.7, 56.6, 38.0, 26.0, 15.9; HRMS (ESI/Q-TOF) *m/z* [M + H]<sup>+</sup> calculated for C<sub>19</sub>H<sub>22</sub>NO<sub>3</sub> 312.1594; found 312.1597.

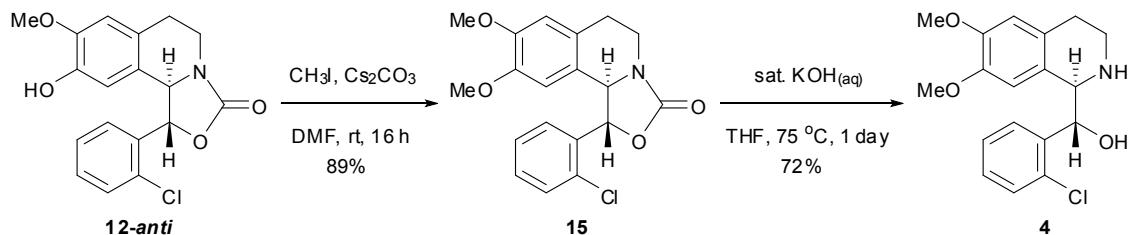

**(1*R*,10*bR*)-1-(2-Chlorophenyl)-8,9-dimethoxy-5,6-dihydro-1*H*-oxazolo[4,3-*a*]isoquinolin-3(10*bH*)-one (15)**

To a solution of **12-anti** (35 mg, 0.10 mmol) and Cs<sub>2</sub>CO<sub>3</sub> (39 mg, 0.12 mmol) in anhydrous DMF (1 mL) was added CH<sub>3</sub>I (8  $\mu$ L, 0.12 mmol) under argon, and the mixture was stirred at room temperature for 16 h. After being quenched with H<sub>2</sub>O (10 mL), the aqueous layer was extracted with EtOAc (2  $\times$  20 mL). The combined organic extracts were washed with brine, dried over anhydrous Na<sub>2</sub>SO<sub>4</sub>, filtered and concentrated. The residue was purified by column chromatography on silica gel (EtOAc/hexane, 20:80 to 25:75) to afford **15** (32 mg, 89%) as a white solid; **mp** 209–210 °C; [ $\alpha$ ]<sub>D</sub><sup>24</sup> –138 (*c* 1.3, CHCl<sub>3</sub>); **<sup>1</sup>H NMR** (CDCl<sub>3</sub>, 500 MHz) 7.59 (1 H, dd, *J* = 7.5, 1.5 Hz), 7.47 (1 H, dd, *J* = 7.5, 1.5 Hz), 7.43–7.35 (2 H, m), 6.79 (1 H, s), 6.62 (1 H, s), 5.78 (1 H, d, *J* = 5.0 Hz), 4.83 (1 H, d, *J* = 5.0 Hz), 4.15 (1 H, dd, *J* = 12.5, 5.5 Hz), 3.87 (3 H, s), 3.82 (3 H, s), 3.20 (1 H, td, *J* = 12.5, 4.0 Hz), 3.10 (1 H, td, *J* = 16.0, 5.5 Hz), 2.62 (1 H, dd, *J* = 16.0, 4.0 Hz); **<sup>13</sup>C NMR** (CDCl<sub>3</sub>, 125 MHz) 157.5, 148.5, 148.1, 136.1, 131.9, 130.3, 130.1, 128.2, 127.8, 126.0, 125.4, 111.8, 107.9, 79.2, 62.0, 55.9, 55.9, 39.3, 26.7; **HRMS** (ESI/Q-TOF) *m/z* [M + H]<sup>+</sup> calculated for C<sub>19</sub>H<sub>19</sub>ClNO<sub>4</sub> 360.0997; found 360.0997.

**(*R*)-(2-Chlorophenyl)((*R*)-6,7-dimethoxy-1,2,3,4-tetrahydroisoquinolin-1-yl)methanol (4)**

To a solution of **15** (19 mg, 0.05 mmol) in THF (3 mL) was added saturated KOH<sub>(aq)</sub> (1 mL), and the mixture was stirred at 75 °C for 1 day. After being quenched with H<sub>2</sub>O (10 mL), the aqueous layer was extracted with CH<sub>2</sub>Cl<sub>2</sub> (2  $\times$  20 mL). The combined organic extracts were washed with brine, dried over anhydrous Na<sub>2</sub>SO<sub>4</sub>, filtered and concentrated. The residue was purified by column chromatography on silica gel (CH<sub>3</sub>OH/CH<sub>2</sub>Cl<sub>2</sub>, 0:100 to 4:96) to afford **4** (12 mg, 72%) as a white foam; [ $\alpha$ ]<sub>D</sub><sup>22</sup> +8 (*c* 0.58, CHCl<sub>3</sub>); **<sup>1</sup>H NMR** (CDCl<sub>3</sub>, 400 MHz) 7.64 (1 H, d, *J* = 6.4 Hz), 7.37–7.32 (2 H, m), 7.25–7.22 (1 H, m), 6.58 (1 H, s), 6.43 (1 H, s), 5.32 (1 H, d, *J* = 4.0 Hz), 4.16 (1 H, d, *J* = 4.0 Hz), 3.85 (3 H, s), 3.66 (3 H, s), 3.27–3.22 (1 H, m), 3.04–2.98 (1 H, m), 2.89–2.82 (1 H, m), 2.68–2.63 (1 H, m); **<sup>13</sup>C NMR** (CDCl<sub>3</sub>, 100 MHz) 147.7, 147.1, 139.8, 132.9, 129.4, 128.6, 128.2, 127.9, 127.0, 126.3, 111.3, 109.4, 71.9, 59.3, 55.8, 55.5, 40.2, 29.1; **HRMS** (ESI/Q-TOF) *m/z* [M + H]<sup>+</sup> calculated for C<sub>18</sub>H<sub>21</sub>ClNO<sub>3</sub> 334.1204; found 334.1207.

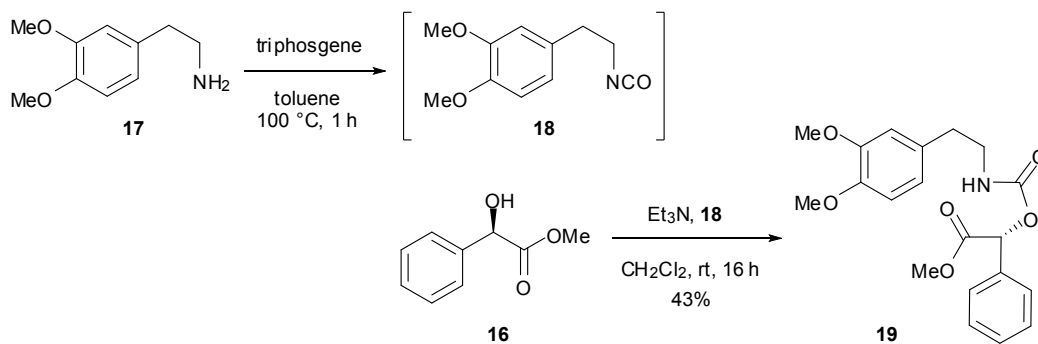

**(R)-Methyl 2-(3,4-dimethoxyphenethylcarbamoyloxy)-2-phenylacetate (19)** To a solution of triphosgene (252 mg, 0.85 mmol) in anhydrous toluene (3 mL) was added a solution of 3,4-dimethoxyphenethylamine (**17**) (170  $\mu$ L, 1.0 mmol) in anhydrous toluene (3 mL) under argon. The mixture was stirred at room temperature for 30 min and heated to 100  $^{\circ}$ C for another 1 h. The resulting mixture was then allowed to cool to room temperature and slowly added into a suspension of **16** (166 mg, 1.0 mmol) and triethylamine (170  $\mu$ L, 1.2 mmol) in anhydrous  $\text{CH}_2\text{Cl}_2$  (5 mL) under argon. After being stirred at room temperature for 16 h, the reaction was quenched by the addition of saturated aqueous  $\text{NH}_4\text{Cl}$ , evaporated *in vacuo* to remove excess toluene and  $\text{CH}_2\text{Cl}_2$ , and then partitioned between  $\text{H}_2\text{O}$  and EtOAc. Following neutralization with saturated aqueous  $\text{NaHCO}_3$ , the organic layer was washed with brine, dried over anhydrous  $\text{Na}_2\text{SO}_4$ , filtered and concentrated. The residue was purified by column chromatography on silica gel (EtOAc/hexane, 20:80 to 25:75 to 30:70) to afford **19** (161 mg, 43%) as a colorless oil;  $[\alpha]_D^{22}$   $-67$  ( $c$  1.8,  $\text{CHCl}_3$ );  $^1\text{H NMR}$  ( $\text{CDCl}_3$ , 500 MHz) 7.44–7.36 (5 H, m), 6.79 (1 H, d,  $J$  = 8.0 Hz), 6.74–6.72 (2 H, m), 5.92 (1 H, s), 5.06 (1 H, br, NH), 3.85 (6 H, s), 3.72 (3 H, s), 3.45–3.42 (2 H, m), 2.78–2.75 (2 H, m);  $^{13}\text{C NMR}$  ( $\text{CDCl}_3$ , 125 MHz) 170.0, 155.2, 148.9, 147.6, 134.1, 130.9, 129.1, 128.7 (2  $\times$ ), 127.6 (2  $\times$ ), 120.6, 111.8, 111.2, 74.5, 55.8, 55.8, 52.5, 42.4, 35.4; **HRMS** (ESI/Q-TOF)  $m/z$   $[\text{M} + \text{Na}]^+$  calculated for  $\text{C}_{20}\text{H}_{23}\text{NO}_6\text{Na}$  396.1418; found 396.1413.

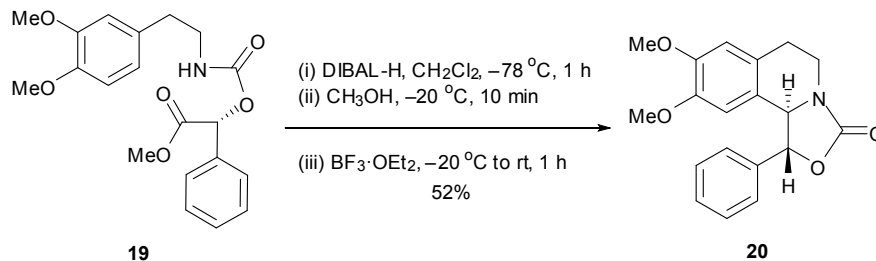

**(1R,10bR)-8,9-Dimethoxy-1-phenyl-5,6-dihydro-1H-oxazolo[4,3-a]isoquinolin-3(10bH)-one (20)** To a solution of **19** (130 mg, 0.35 mmol) in anhydrous toluene (10 mL) was added dropwise a solution of DIBAL-H (25% in toluene, 470  $\mu$ L, 0.7 mmol) at  $-78$   $^{\circ}$ C under argon, and the mixture was stirred at  $-78$   $^{\circ}$ C for 1 h. Then,  $\text{CH}_3\text{OH}$  (280  $\mu$ L) was added, and the reaction was

stirred at  $-20\text{ }^{\circ}\text{C}$  for 10 min. Following the addition of  $\text{BF}_3\cdot\text{OEt}_2$  (430  $\mu\text{L}$ , 3.5 mmol), the resulting mixture was stirred at room temperature for another 1 h. This reaction mixture was quenched with  $\text{H}_2\text{O}$  (5 mL), evaporated *in vacuo* to remove excess  $\text{CH}_3\text{OH}$ , and then partitioned between  $\text{H}_2\text{O}$  and  $\text{EtOAc}$ . After neutralization with saturated aqueous  $\text{NaHCO}_3$ , the organic layer was washed with brine, dried over anhydrous  $\text{Na}_2\text{SO}_4$ , filtered and concentrated. The residue was purified by column chromatography on silica gel ( $\text{EtOAc}/\text{hexane}$ , 20:80 to 30:70) to afford **20** (60 mg, 52%) as a white solid; **mp** 175–176  $^{\circ}\text{C}$ ;  $[\alpha]^{22}_{\text{D}} -126$  (*c* 3.5,  $\text{CHCl}_3$ );  $^1\text{H NMR}$  ( $\text{CDCl}_3$ , 500 MHz) 7.52–7.42 (5 H, m), 6.63 (1 H, s), 6.30 (1 H, s), 5.13 (1 H, d,  $J = 7.5$  Hz), 4.85 (1 H, d,  $J = 7.5$  Hz), 4.17 (1 H, dd,  $J = 13.0, 5.5$  Hz), 3.85 (3 H, s), 3.69 (3 H, s), 3.15 (1 H, td,  $J = 13.0, 3.0$  Hz), 3.01 (1 H, td,  $J = 16.0, 5.5$  Hz), 2.65 (1 H, dd,  $J = 16.0, 3.0$  Hz);  $^{13}\text{C NMR}$  ( $\text{CDCl}_3$ , 125 MHz) 156.6, 148.3, 148.0, 137.7, 129.4, 129.0 (2  $\times$ ), 127.0 (2  $\times$ ), 125.7, 125.0, 111.9, 107.3, 83.9, 61.5, 55.8, 55.7, 38.5, 27.6; **HRMS** (ESI/Q-TOF)  $m/z$   $[\text{M} + \text{H}]^+$  calculated for  $\text{C}_{19}\text{H}_{20}\text{NO}_4$  326.1387; found 326.1393.

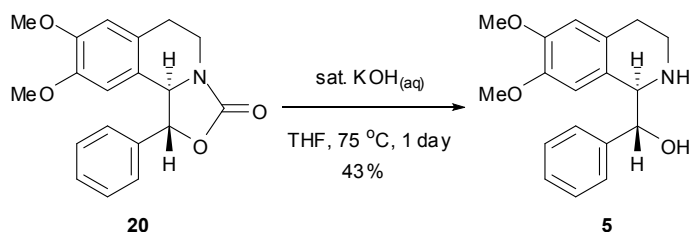

**(R)-((R)-6,7-Dimethoxy-1,2,3,4-tetrahydroisoquinolin-1-yl)(phenyl)methanol (5)** To a solution of **20** (30 mg, 0.09 mmol) in THF (2 mL) was added saturated  $\text{KOH}_{(\text{aq})}$  (1 mL), and the mixture was stirred at 75  $^{\circ}\text{C}$  for 1 day. After being quenched with  $\text{H}_2\text{O}$  (10 mL), the aqueous layer was extracted with  $\text{CH}_2\text{Cl}_2$  (2  $\times$  20 mL). The combined organic extracts were washed with brine, dried over anhydrous  $\text{Na}_2\text{SO}_4$ , filtered and concentrated. The residue was purified by column chromatography on silica gel ( $\text{CH}_3\text{OH}/\text{CH}_2\text{Cl}_2$ , 5:95 to 10:90) to afford **5** (12 mg, 43%) as a pale yellow solid; **mp** 142–144  $^{\circ}\text{C}$ ;  $[\alpha]^{22}_{\text{D}} +30$  (*c* 0.83,  $\text{CHCl}_3$ );  $^1\text{H NMR}$  ( $\text{CD}_3\text{OD}$ , 500 MHz) 7.38–7.28 (5 H, m), 6.68 (1 H, s), 5.58 (1 H, s), 4.80 (1 H, d,  $J = 8.0$  Hz), 4.04 (1 H, d,  $J = 8.0$  Hz), 3.76 (3 H, s), 3.46–3.38 (1 H, m), 3.24 (3 H, s), 3.12–3.10 (1 H, m), 2.96–2.91 (1 H, m), 2.84–2.81 (1 H, m);  $^{13}\text{C NMR}$  ( $\text{CD}_3\text{OD}$ , 125 MHz) 149.6, 147.6, 143.6, 129.6 (2  $\times$ ), 129.2 (3  $\times$ ), 128.1, 125.6, 113.1, 112.8, 75.5, 62.3, 56.4, 55.8, 39.0, 28.5; **HRMS** (ESI/Q-TOF)  $m/z$   $[\text{M} + \text{H}]^+$  calculated for  $\text{C}_{18}\text{H}_{22}\text{NO}_3$  300.1594; found 300.1594.

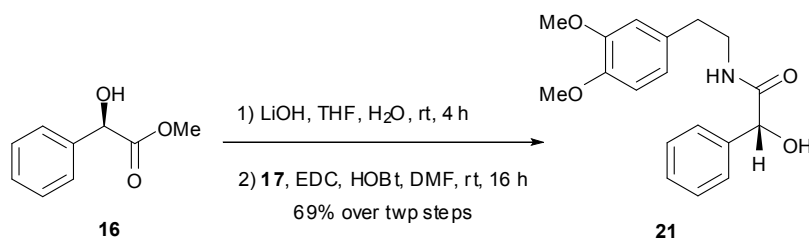

**(R)-N-(3,4-Dimethoxyphenethyl)-2-hydroxy-2-phenylacetamide (21)** To a solution of methyl (*R*)-(-)-mandelate (**16**) (332 mg, 2.0 mmol) in THF (3 mL) and H<sub>2</sub>O (3 mL) was added LiOH·H<sub>2</sub>O (672 mg, 16.0 mmol), and the mixture was stirred at room temperature for 4 h. After being quenched with H<sub>2</sub>O (10 mL), the aqueous layer was extracted with EtOAc (2 × 20 mL). The combined organic extracts were washed with brine, dried over anhydrous Na<sub>2</sub>SO<sub>4</sub>, filtered and concentrated to afford the mandelic acid as the crude product. To a solution of this crude product, 3,4-dimethoxyphenethylamine (**17**) (370 μL, 2.2 mmol) and HOBT hydrate (337 mg, 2.2 mmol) in anhydrous DMF (4 mL) was added EDC (422 mg, 2.2 mmol) under argon. The resulting mixture was stirred at room temperature for 16 h and then quenched by the addition of 1 N HCl<sub>(aq)</sub>. The aqueous layer was extracted with EtOAc (2 × 20 mL). Following neutralization with saturated aqueous NaHCO<sub>3</sub>, the combined organic extracts were washed with brine, dried over anhydrous Na<sub>2</sub>SO<sub>4</sub>, filtered and concentrated. The residue was purified by column chromatography on silica gel (EtOAc/hexane, 40:60) to afford **21** (433 mg, 69%) as a pale yellow oil;  $[\alpha]_D^{25}$  -39 (*c* 1.9, CHCl<sub>3</sub>); <sup>1</sup>H NMR (CDCl<sub>3</sub>, 400 MHz) 7.33–7.29 (5 H, m), 6.73 (1 H, d, *J* = 8.4 Hz), 6.62 (1 H, d, *J* = 2.0 Hz), 6.56 (1 H, dd, *J* = 8.4, 2.0 Hz), 6.25 (1 H, br, NH), 4.94 (1 H, s), 3.84 (3 H, s), 3.80 (4 H, s, OCH<sub>3</sub> and OH), 3.51–3.44 (2 H, m), 2.72–2.67 (2 H, m); <sup>13</sup>C NMR (CDCl<sub>3</sub>, 100 MHz) 172.3, 148.7, 147.4, 139.4, 130.8, 128.4 (2 ×), 128.2, 126.5 (2 ×), 120.5, 111.6, 111.1, 73.8, 55.7, 55.6, 40.3, 34.9; HRMS (ESI/Q-TOF) *m/z* [M + Na]<sup>+</sup> calculated for C<sub>18</sub>H<sub>21</sub>NO<sub>4</sub>Na 338.1363; found 338.1360.

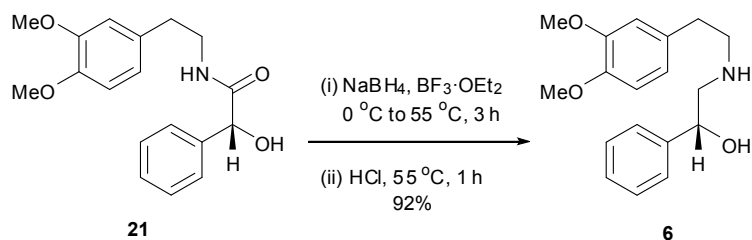

**(R)-2-(3,4-Dimethoxyphenethylamino)-1-phenylethanol (6)** To a solution of **21** (180 mg, 0.57 mmol) in THF (5 mL) was added NaBH<sub>4</sub> (45 mg, 1.2 mmol) at 0 °C under argon. Following the addition of BF<sub>3</sub>·OEt<sub>2</sub> (300 μL, 2.4 mmol) dropwise at 0 °C under argon, the resulting mixture was stirred at 55 °C for 3 h. After completion of the reaction, the mixture was cooled to 0 °C, treated with H<sub>2</sub>O (5 mL) and 6 N HCl<sub>(aq)</sub> (5 mL), and then heated at 55 °C for another 1 h. The

reaction mixture was cooled to room temperature, treated with 10% NaOH<sub>(aq)</sub> to adjust the pH value to 10–12, and evaporated *in vacuo* to remove excess THF. After being partitioned between H<sub>2</sub>O and CH<sub>2</sub>Cl<sub>2</sub>, the organic layer was washed with brine, dried over anhydrous Na<sub>2</sub>SO<sub>4</sub>, filtered and concentrated. The residue was purified by column chromatography on silica gel (CH<sub>3</sub>OH/CH<sub>2</sub>Cl<sub>2</sub>, 5:95 to 10:90) to afford **6** (158 mg, 92%) as a white solid; **mp** 87–88 °C; **[α]<sup>22</sup><sub>D</sub>** –38 (*c* 3.9, CHCl<sub>3</sub>); **<sup>1</sup>H NMR** (CDCl<sub>3</sub>, 500 MHz) 7.37–7.26 (5 H, m), 6.79 (1 H, d, *J* = 8.0 Hz), 6.74–6.71 (2 H, m), 4.78 (1 H, dd, *J* = 9.0, 3.5 Hz), 3.87 (3 H, s), 3.86 (3 H, s), 3.17 (1 H, br), 3.00–2.89 (3 H, m), 2.82–2.75 (3 H, m); **<sup>13</sup>C NMR** (CDCl<sub>3</sub>, 125 MHz) 148.9, 147.5, 142.1, 131.7, 128.4 (2 ×), 127.6, 125.8 (2 ×), 120.6, 111.8, 111.2, 71.3, 56.7, 55.9, 55.8, 50.6, 35.5; **HRMS** (ESI/Q-TOF) *m/z* [M + H]<sup>+</sup> calculated for C<sub>18</sub>H<sub>24</sub>NO<sub>3</sub> 302.1751; found 302.1747.

#### 4. Copies of the $^1\text{H}$ and $^{13}\text{C}$ NMR spectra

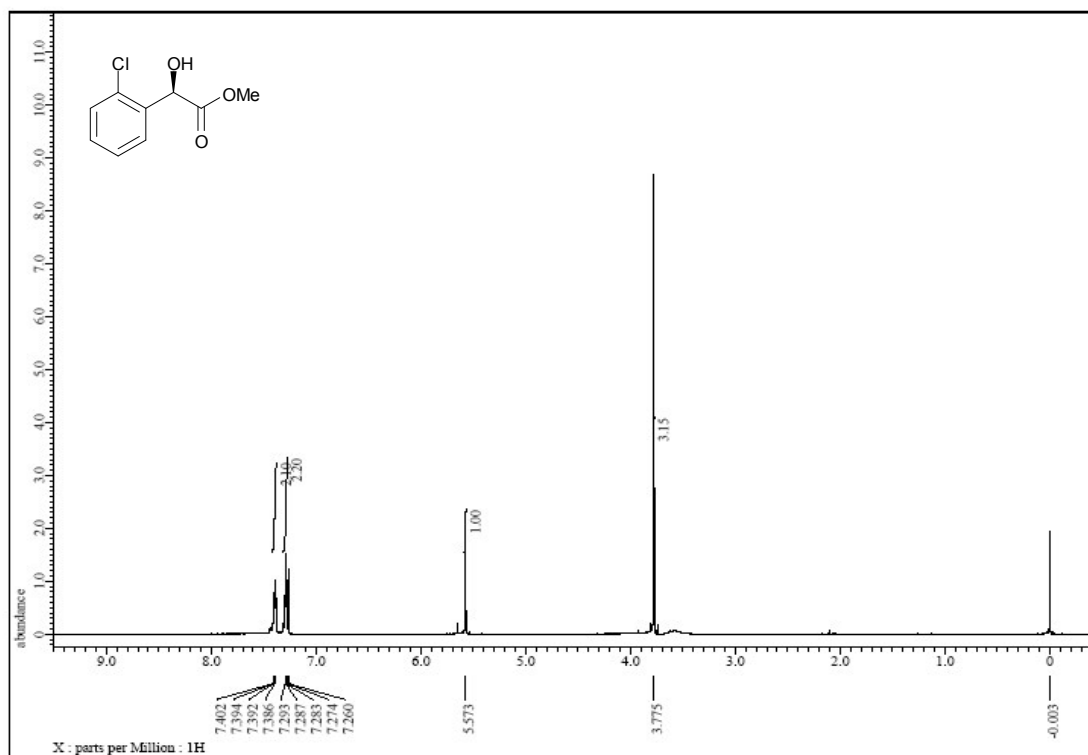

$^1\text{H}$  NMR ( $\text{CDCl}_3$ , 500 MHz) spectra of **9**

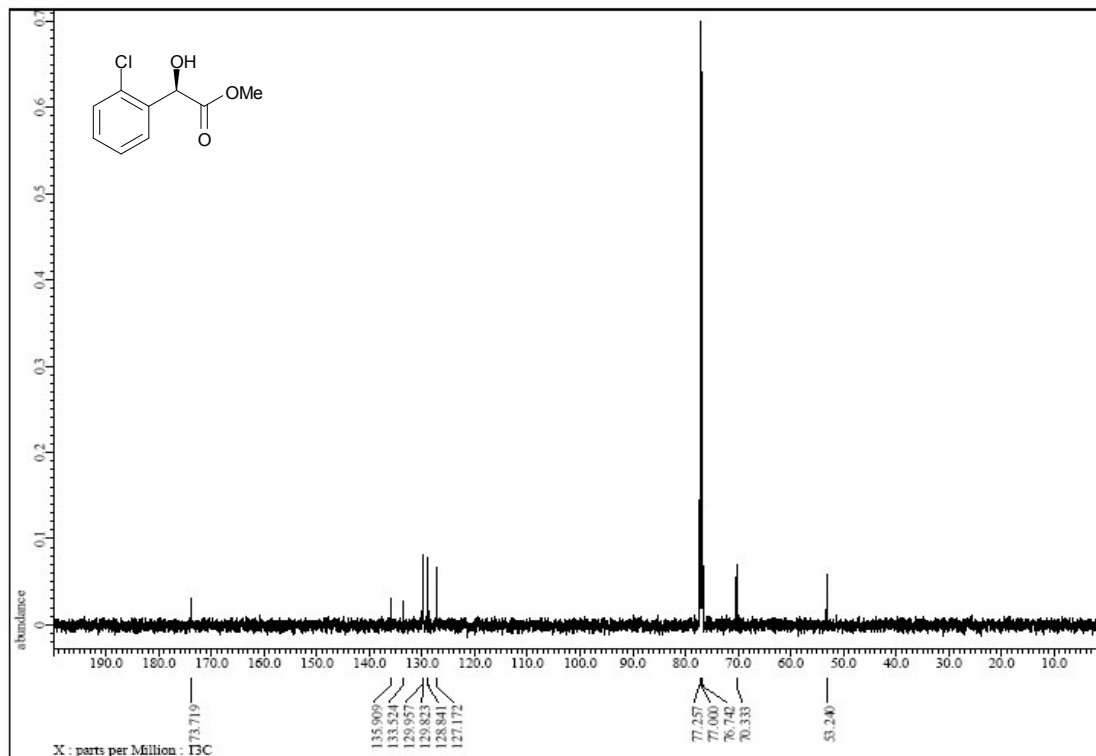

$^{13}\text{C}$  NMR ( $\text{CDCl}_3$ , 125 MHz) spectra of **9**



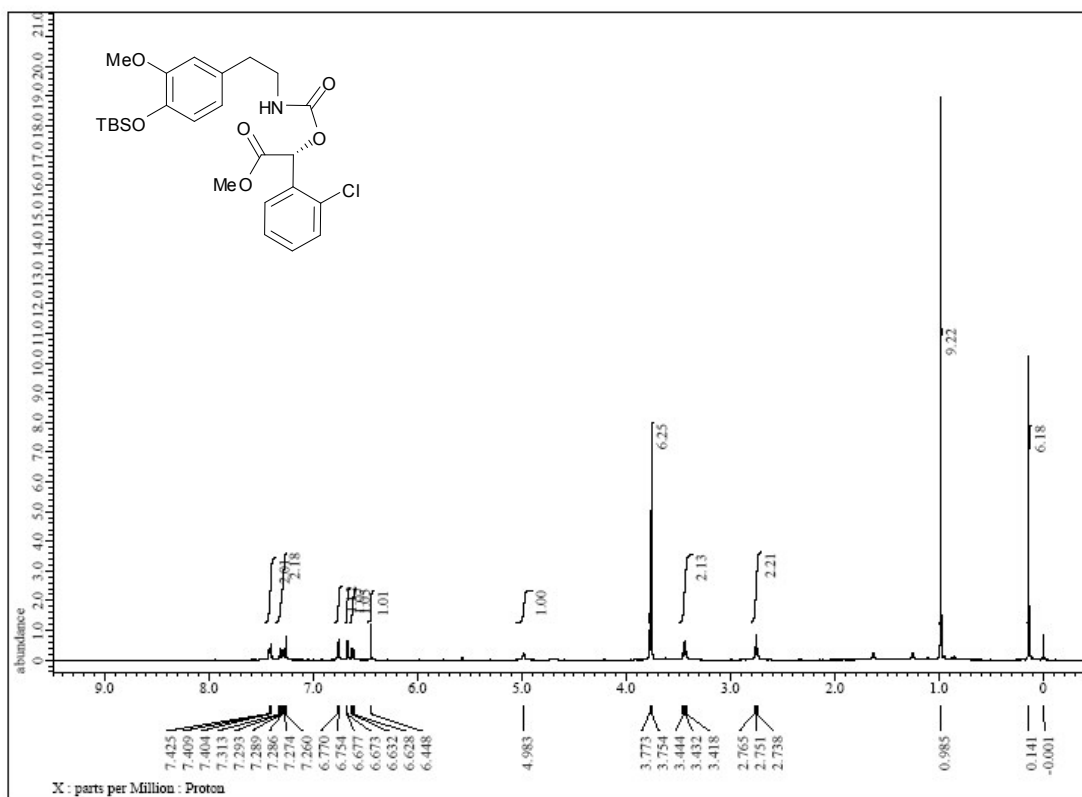

<sup>1</sup>H NMR (CDCl<sub>3</sub>, 500 MHz) spectrum of **11**

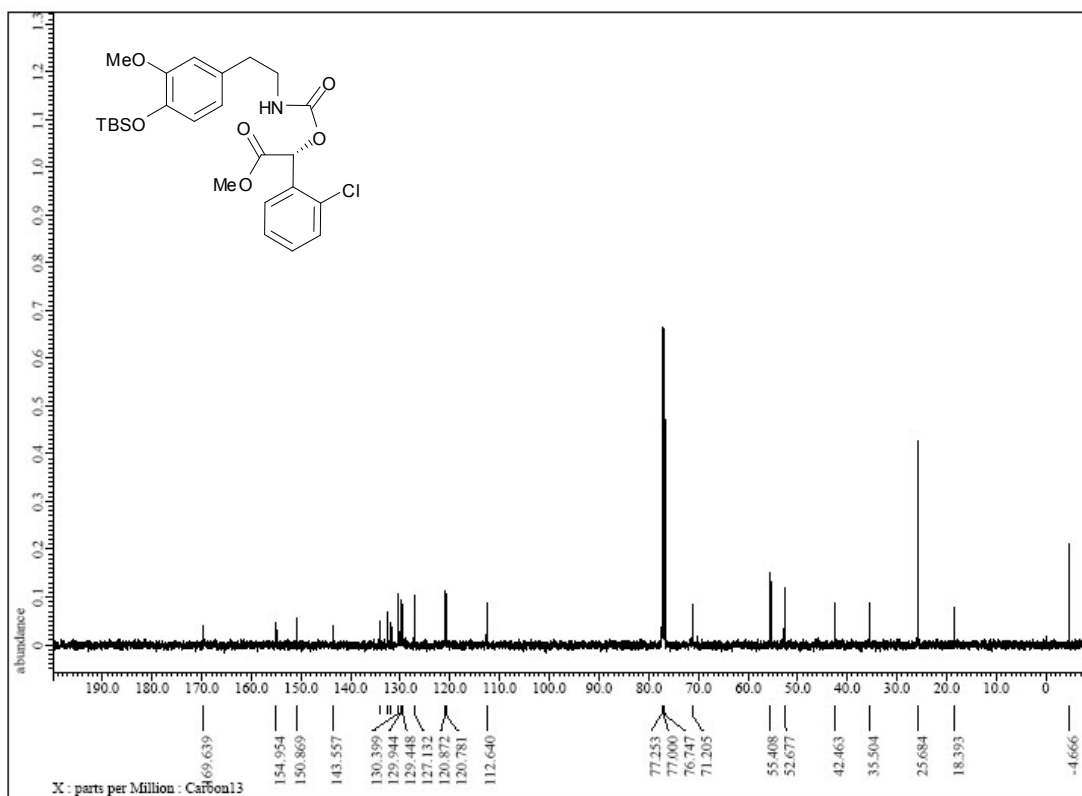

<sup>13</sup>C NMR (CDCl<sub>3</sub>, 125 MHz) spectrum of **11**

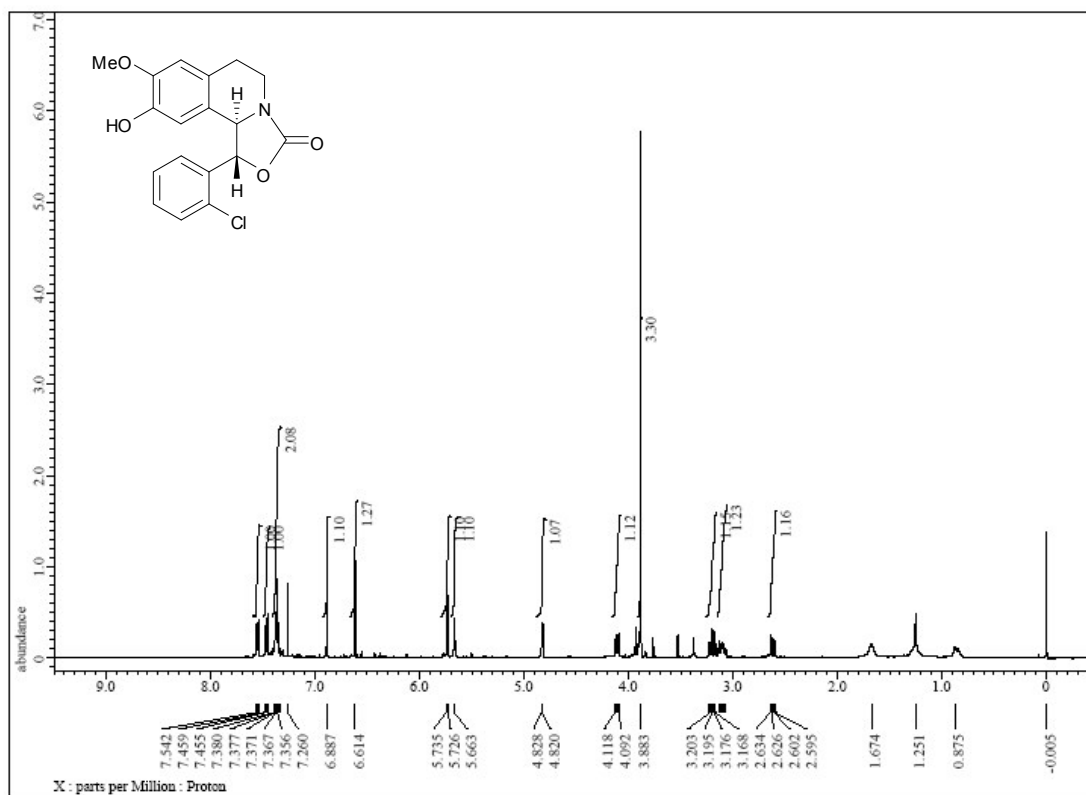

<sup>1</sup>H NMR (CDCl<sub>3</sub>, 500 MHz) spectrum of **12-anti**

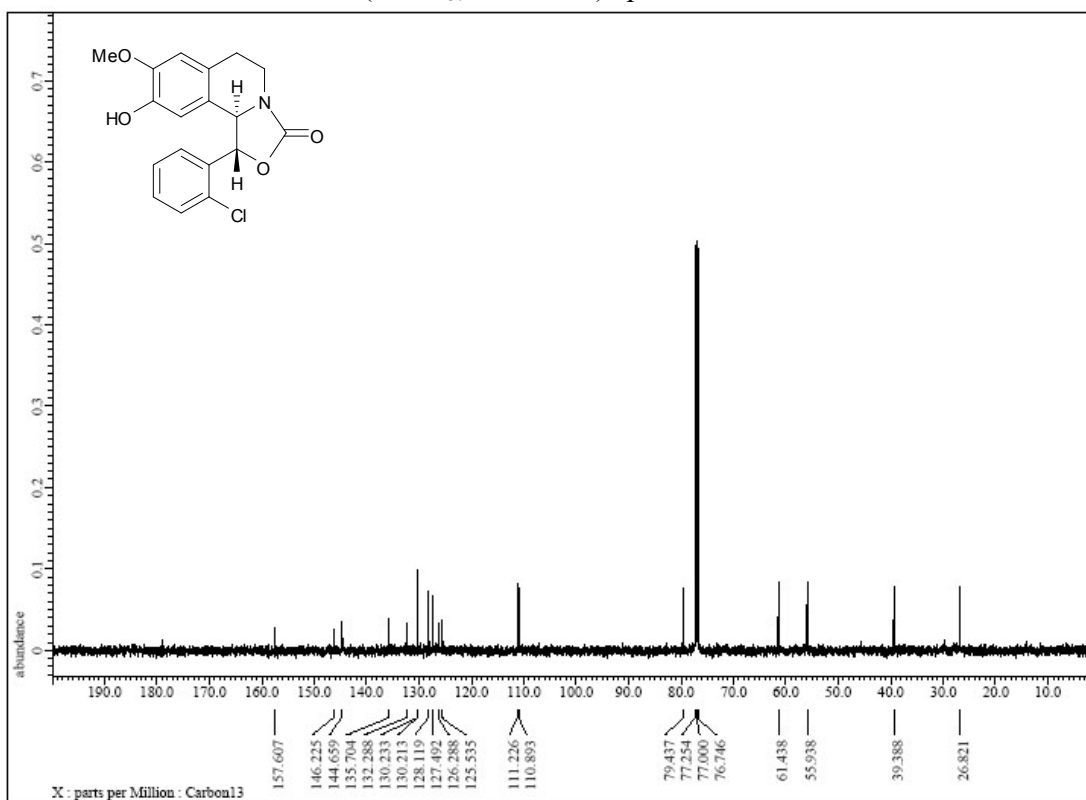

<sup>13</sup>C NMR (CDCl<sub>3</sub>, 125 MHz) spectrum of **12-anti**

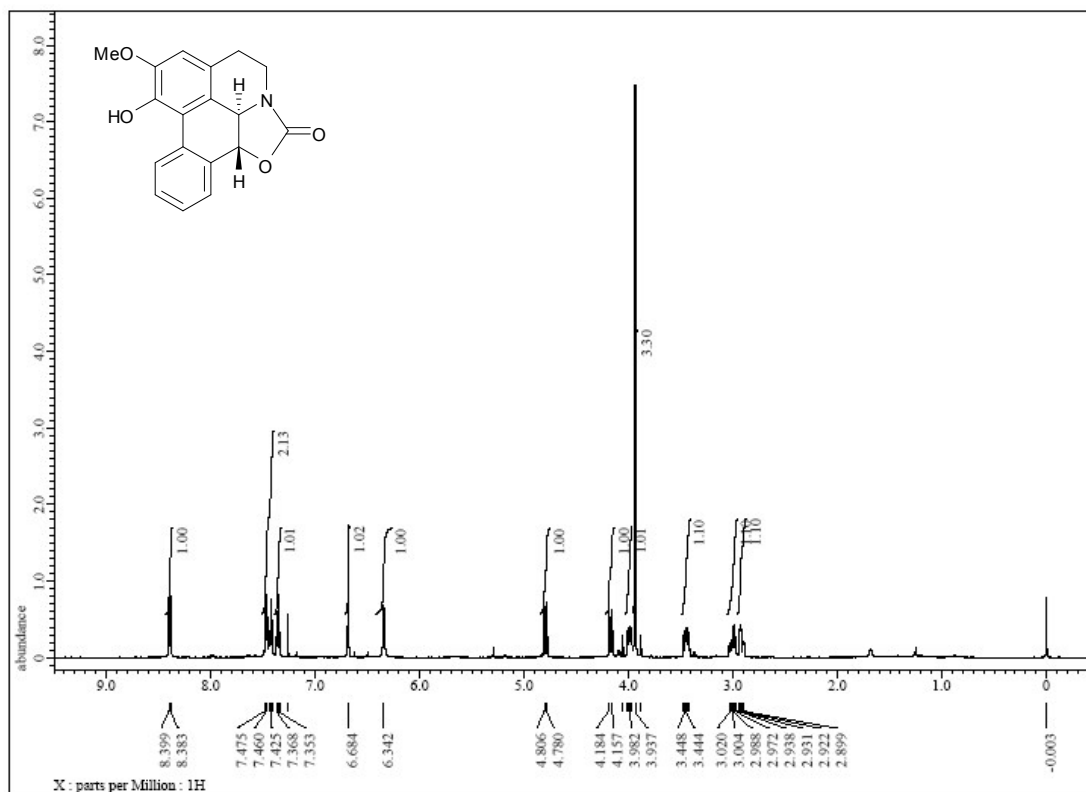

$^1\text{H}$  NMR (CDCl<sub>3</sub>, 500 MHz) spectrum of **13-anti**

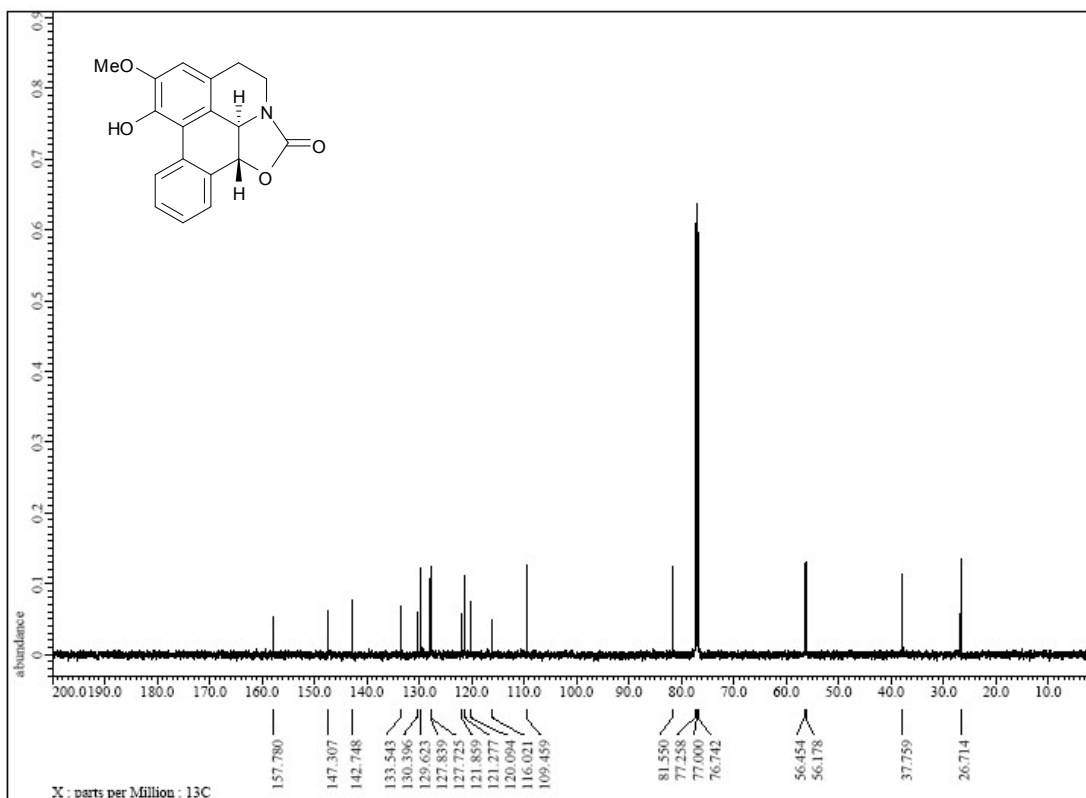

$^{13}\text{C}$  NMR (CDCl<sub>3</sub>, 125 MHz) spectrum of **13-anti**

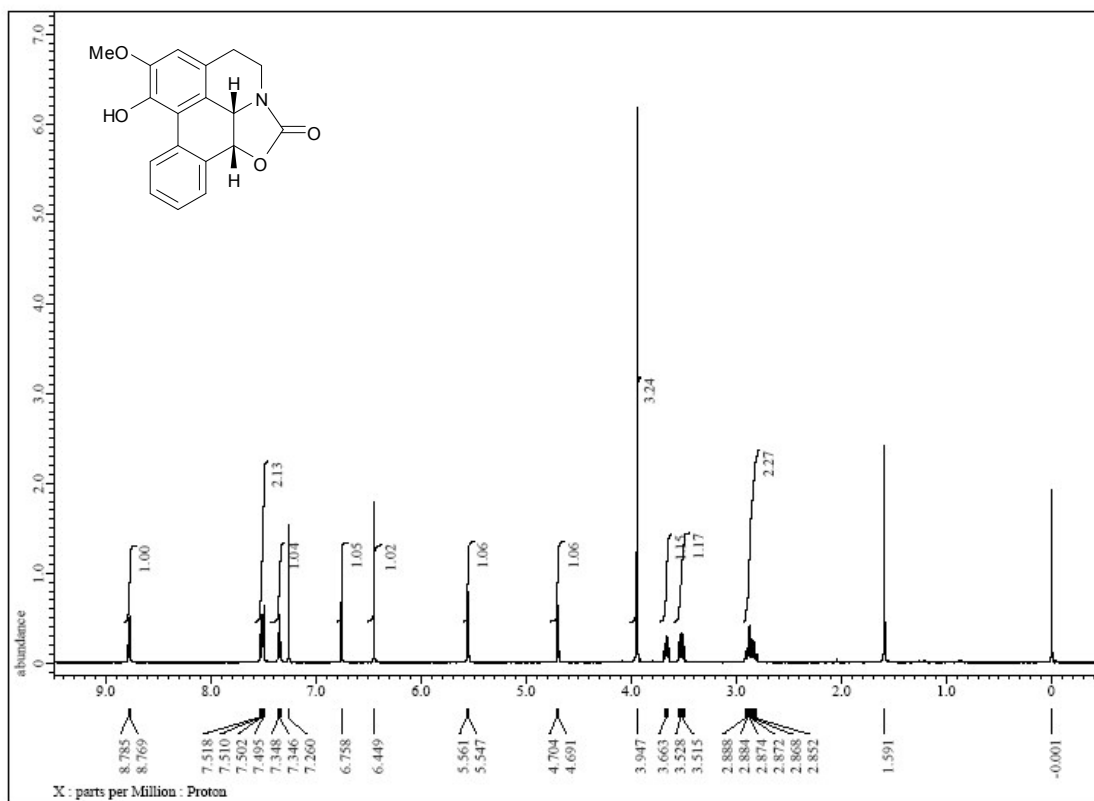

<sup>1</sup>H NMR (CDCl<sub>3</sub>, 500 MHz) spectrum of **13-syn**

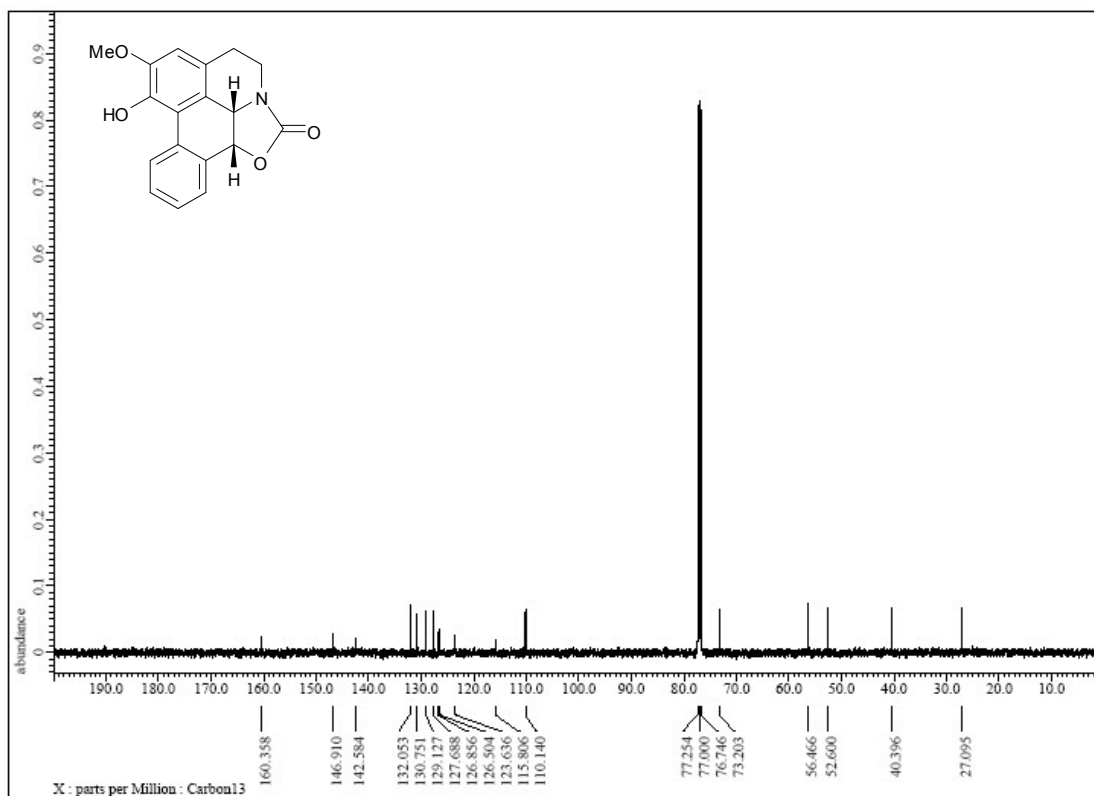

<sup>13</sup>C NMR (CDCl<sub>3</sub>, 125 MHz) spectrum of **13-syn**

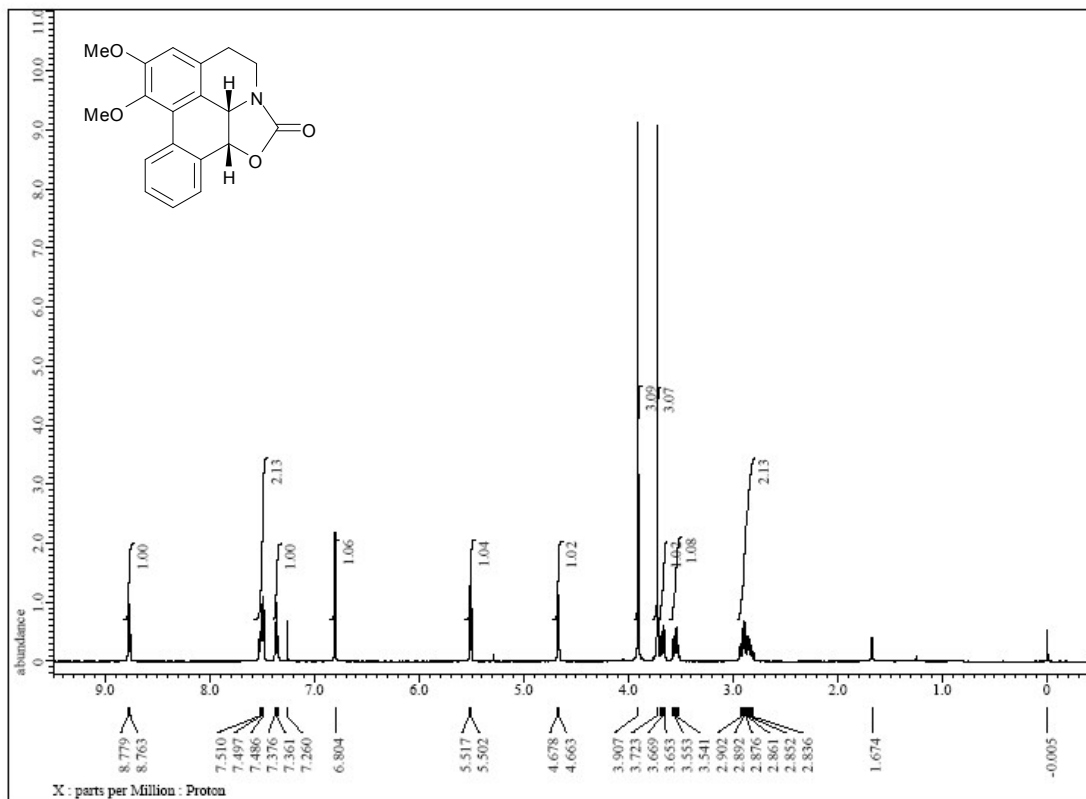

<sup>1</sup>H NMR (CDCl<sub>3</sub>, 500 MHz) spectrum of S1

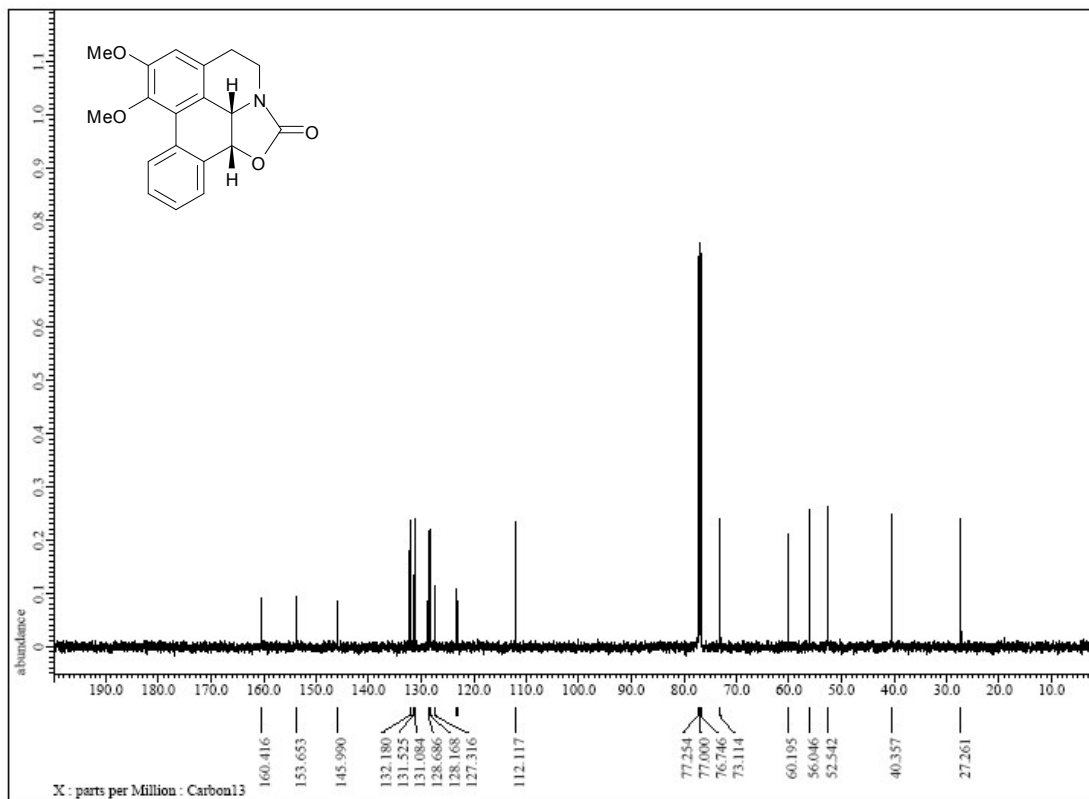

<sup>13</sup>C NMR (CDCl<sub>3</sub>, 125 MHz) spectrum of S1

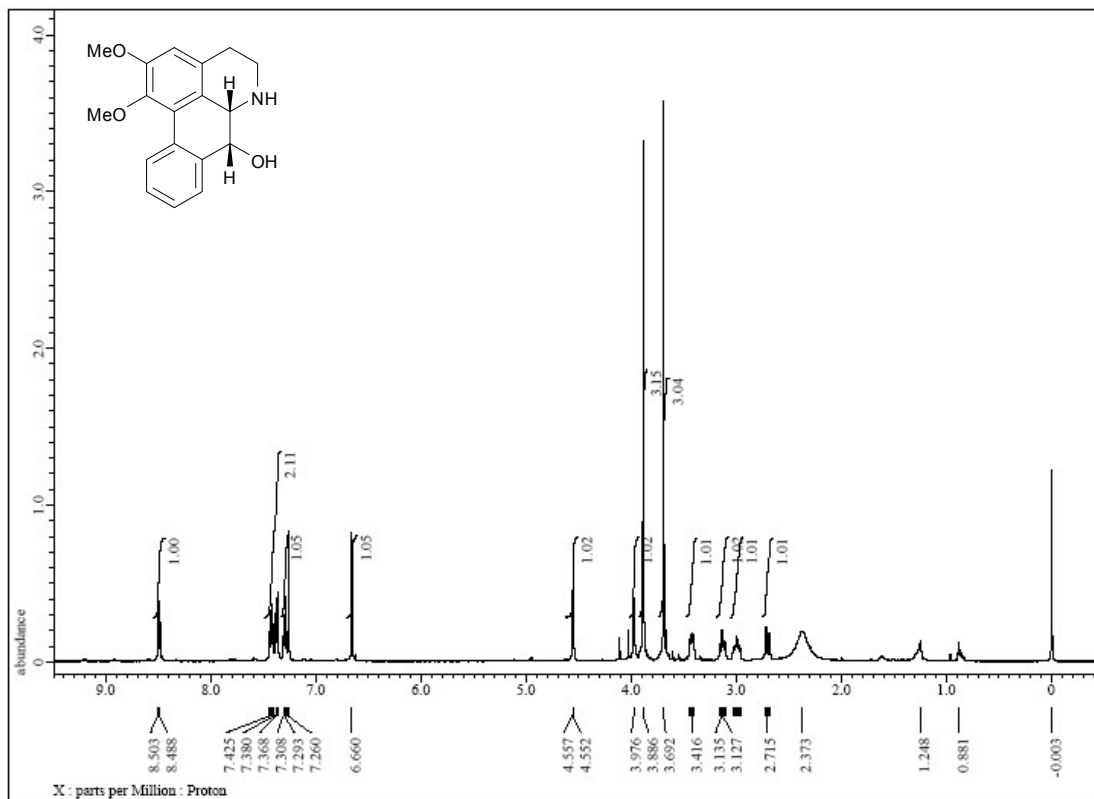

<sup>1</sup>H NMR (CDCl<sub>3</sub>, 500 MHz) spectrum of **1**

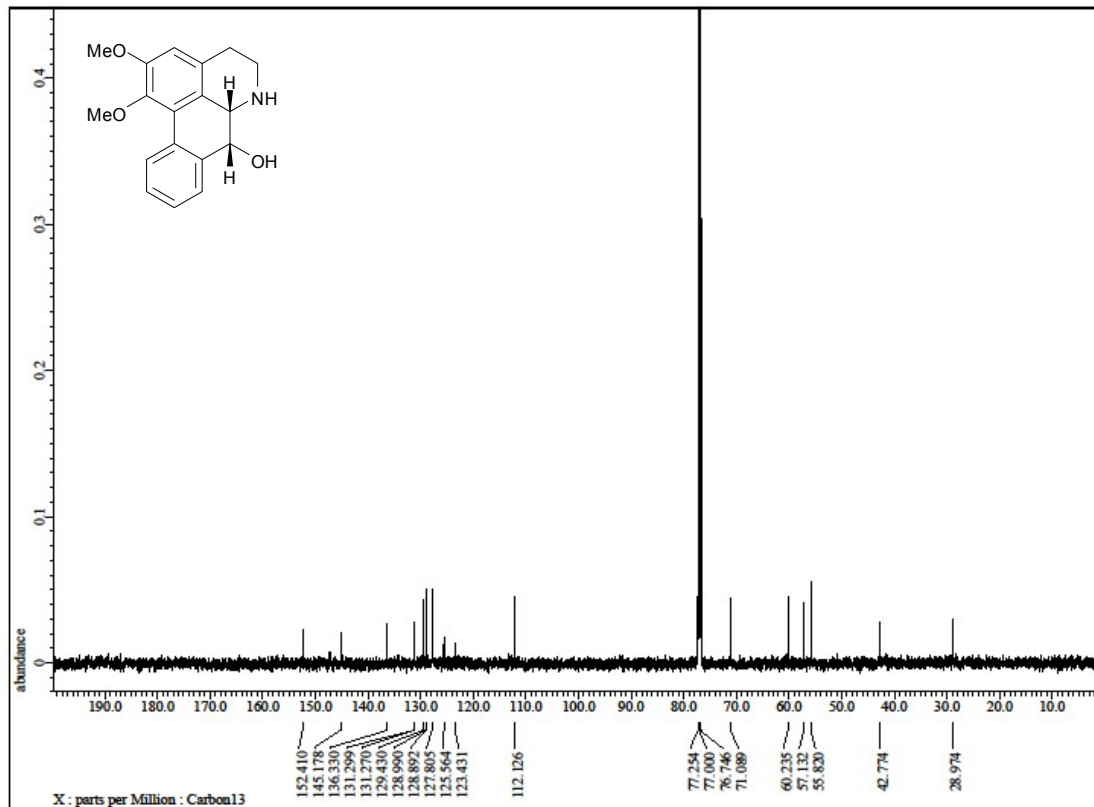

<sup>13</sup>C NMR (CDCl<sub>3</sub>, 125 MHz) spectrum of **1**

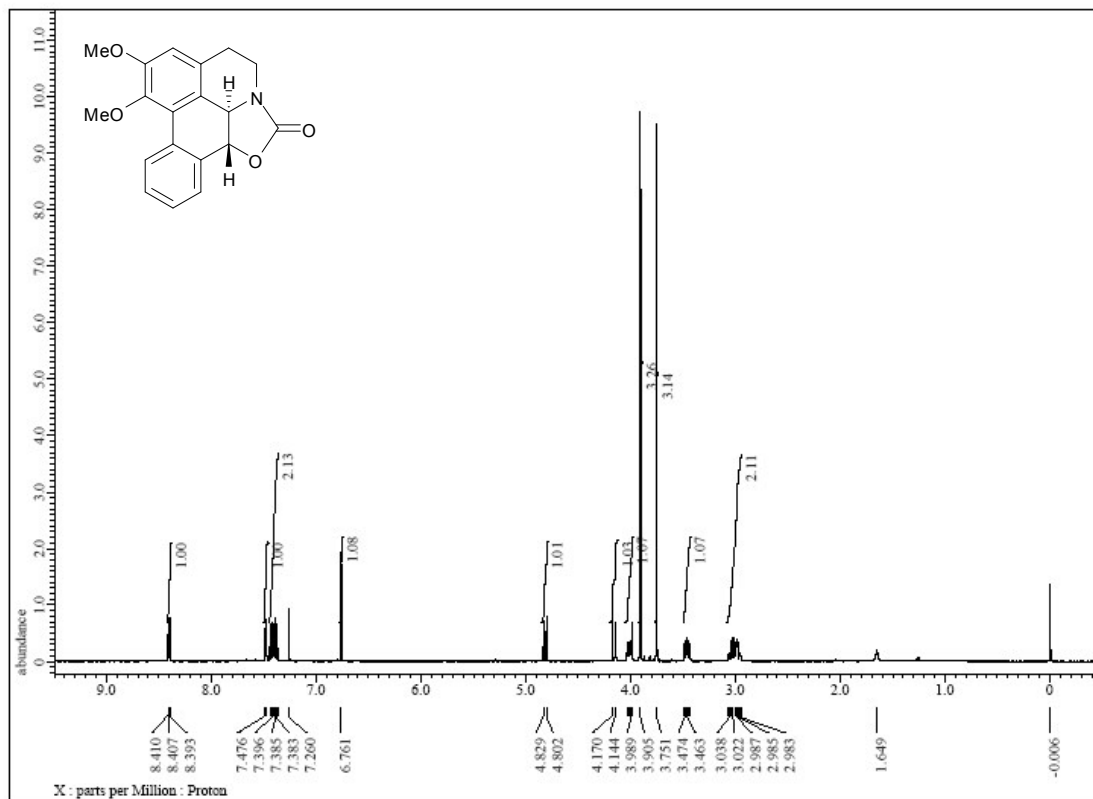

<sup>1</sup>H NMR (CDCl<sub>3</sub>, 500 MHz) spectrum of **S2**

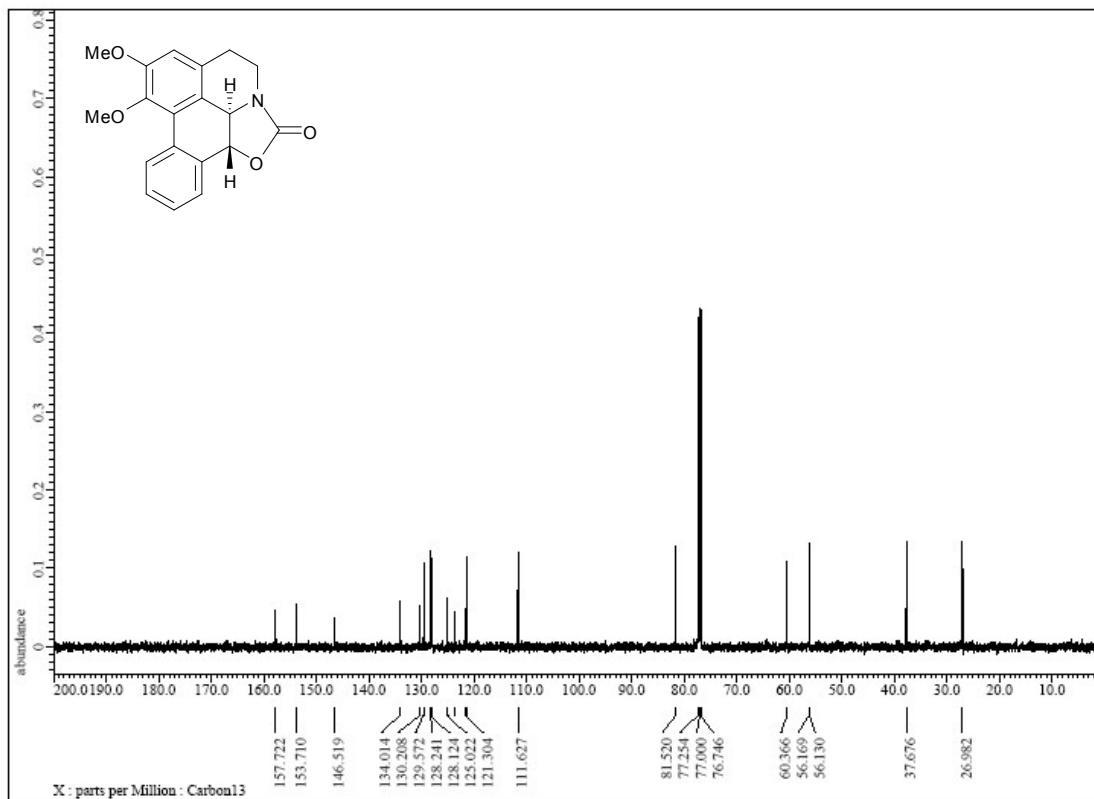

<sup>13</sup>C NMR (CDCl<sub>3</sub>, 125 MHz) spectrum of **S2**

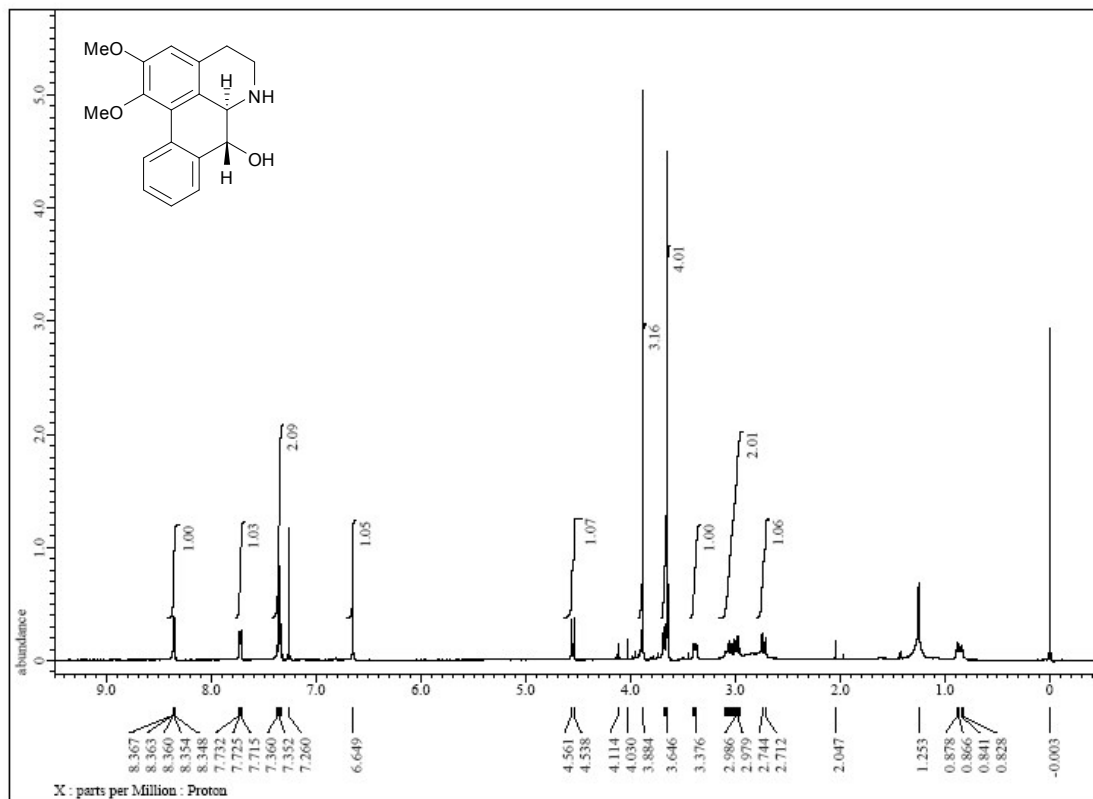

<sup>1</sup>H NMR (CDCl<sub>3</sub>, 500 MHz) spectrum of **2**

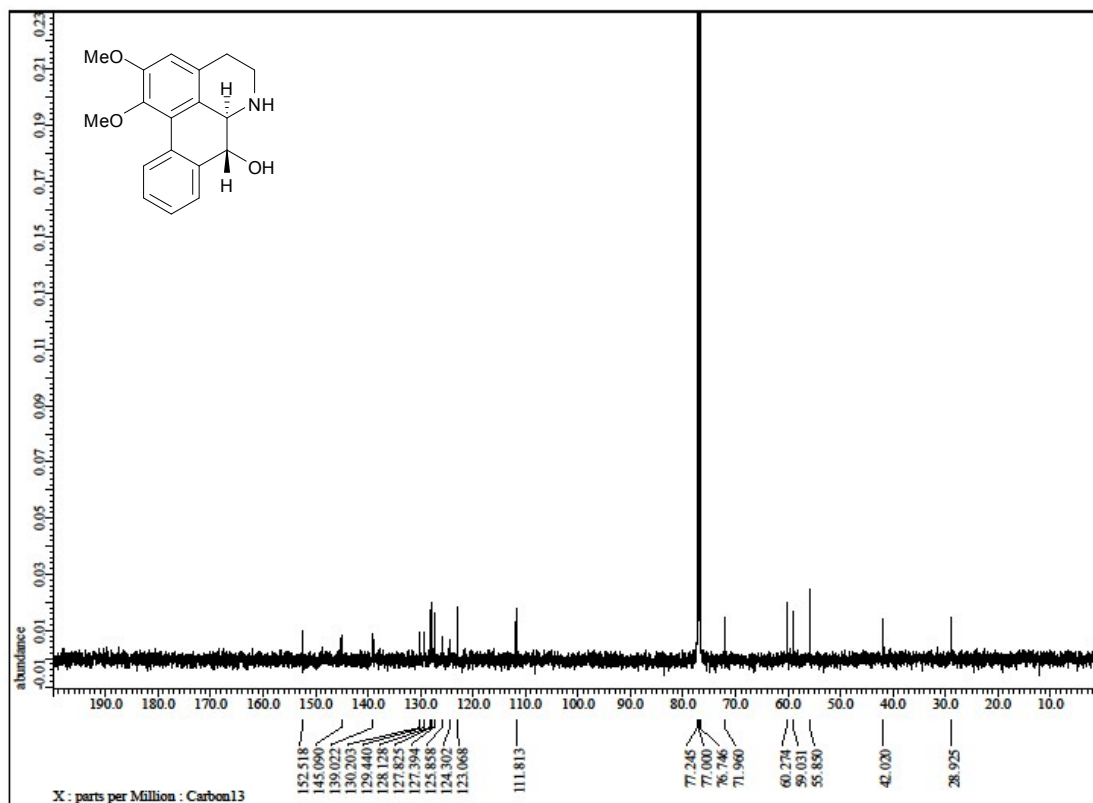

<sup>13</sup>C NMR (CDCl<sub>3</sub>, 125 MHz) spectrum of **2**



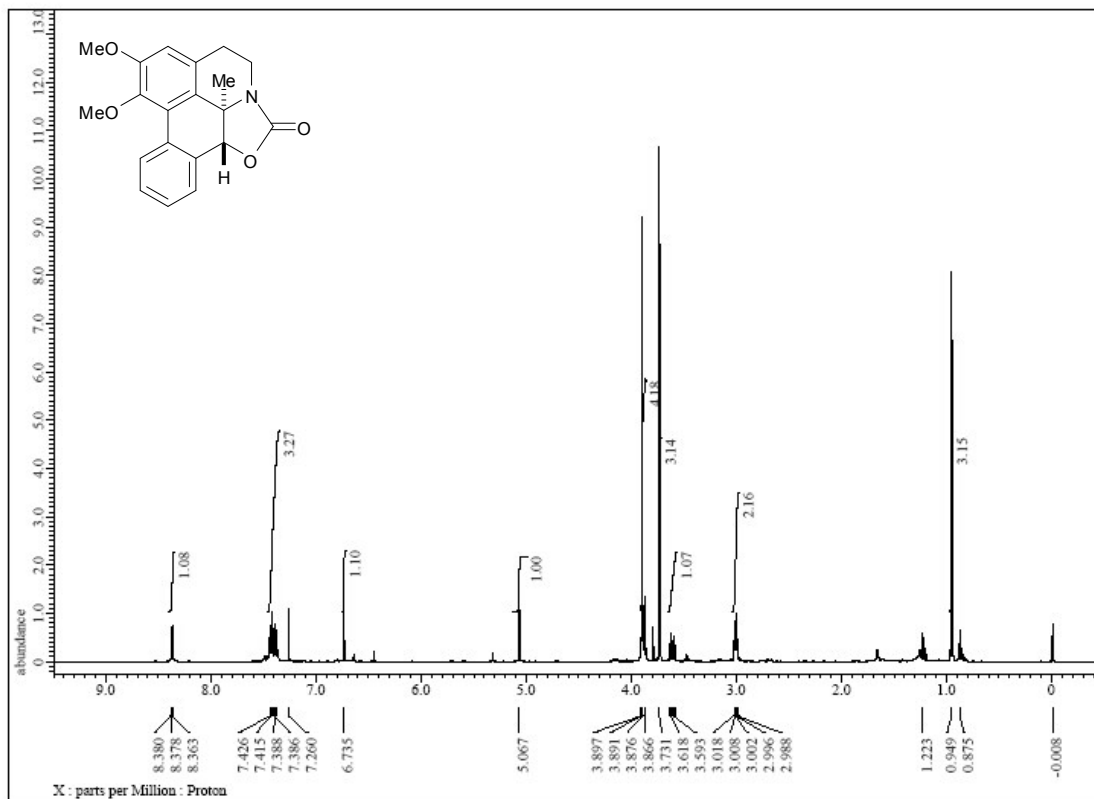

<sup>1</sup>H NMR (CDCl<sub>3</sub>, 500 MHz) spectrum of **S3**

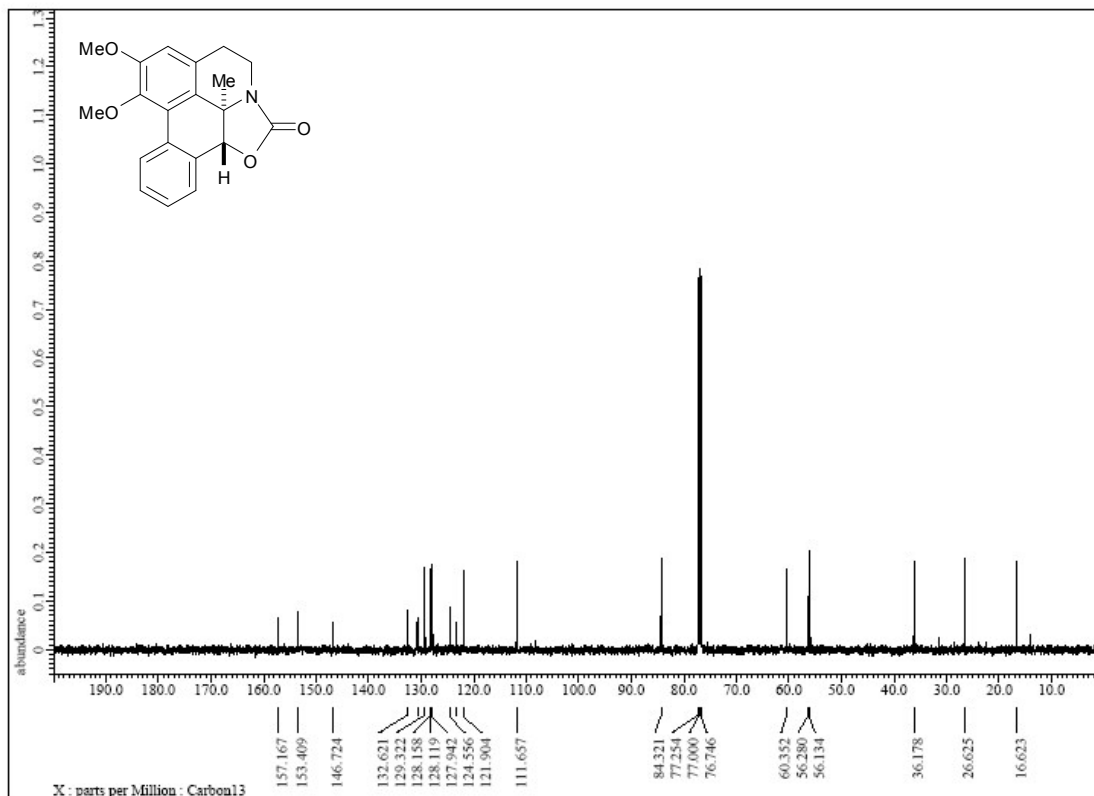

<sup>13</sup>C NMR (CDCl<sub>3</sub>, 125 MHz) spectrum of **S3**

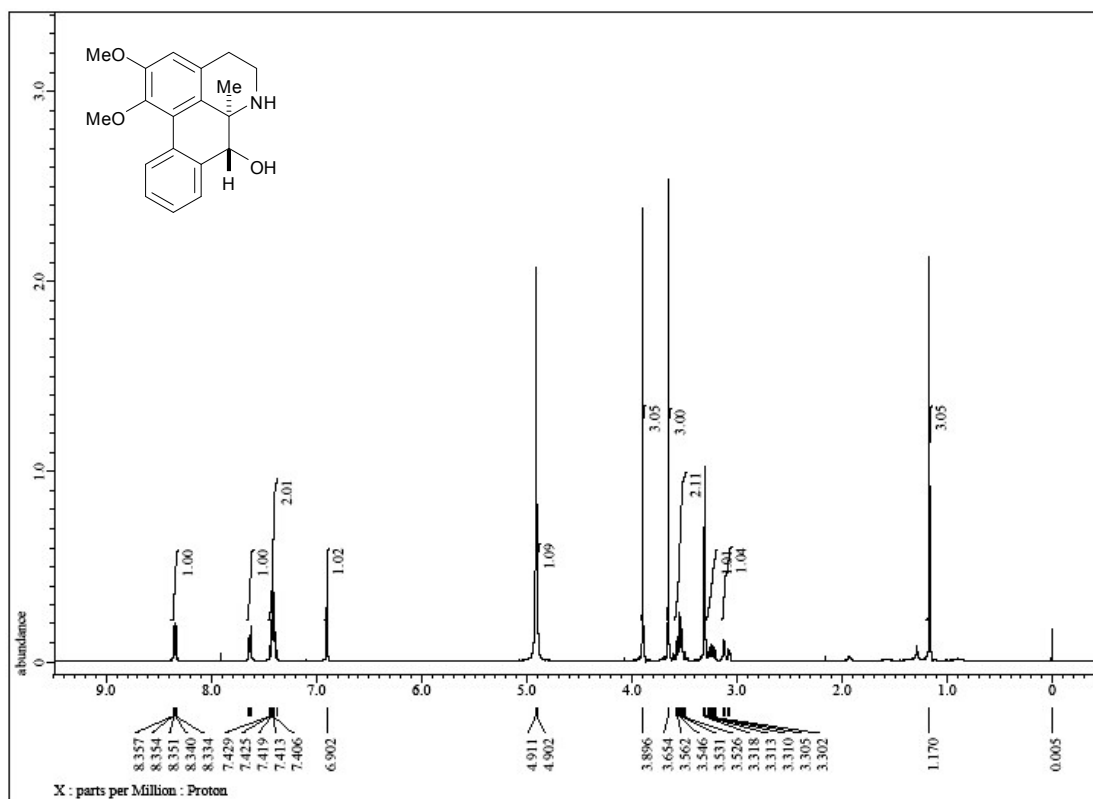

<sup>1</sup>H NMR (CD<sub>3</sub>OD, 400 MHz) spectrum of **3**

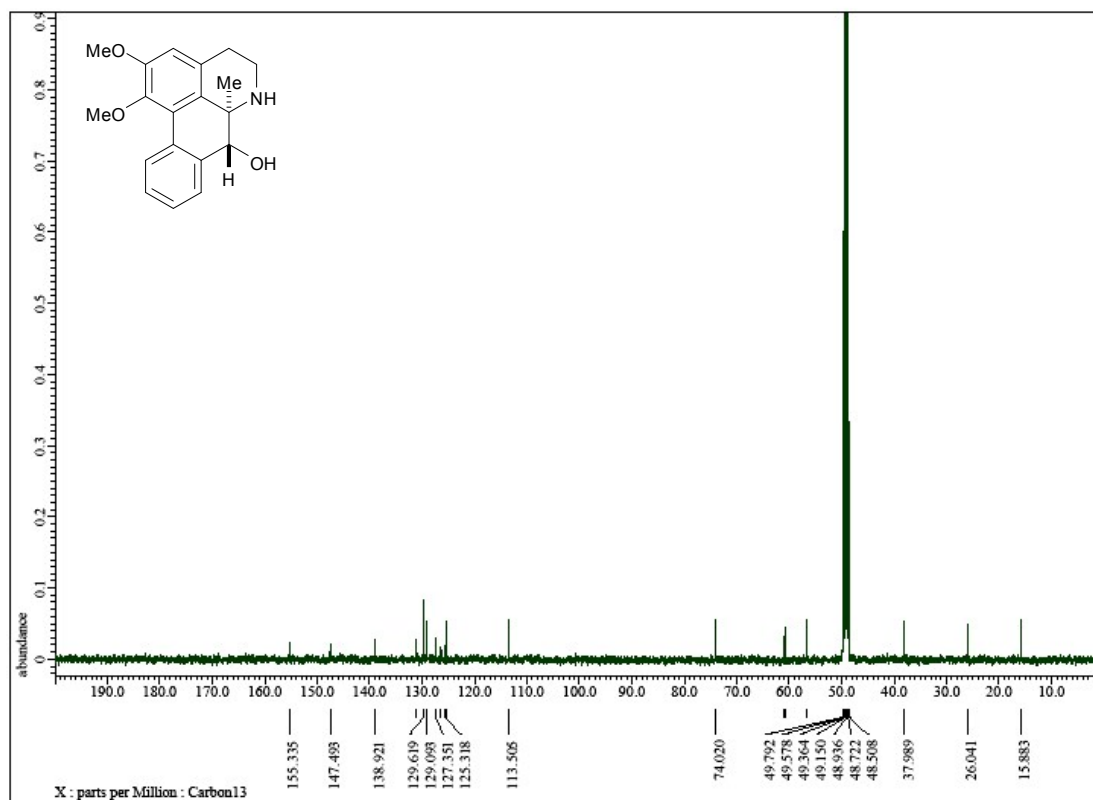

<sup>13</sup>C (CD<sub>3</sub>OD, 100 MHz) NMR spectrum of **3**

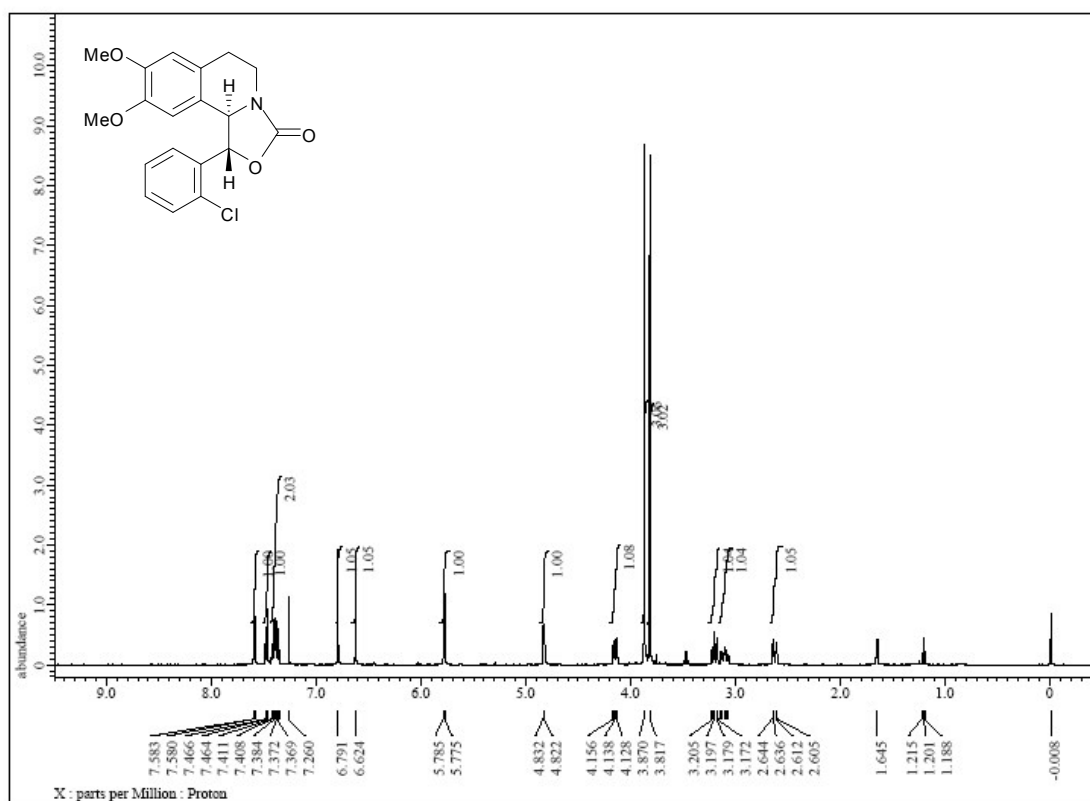

<sup>1</sup>H NMR (CDCl<sub>3</sub>, 500 MHz) spectrum of **15**

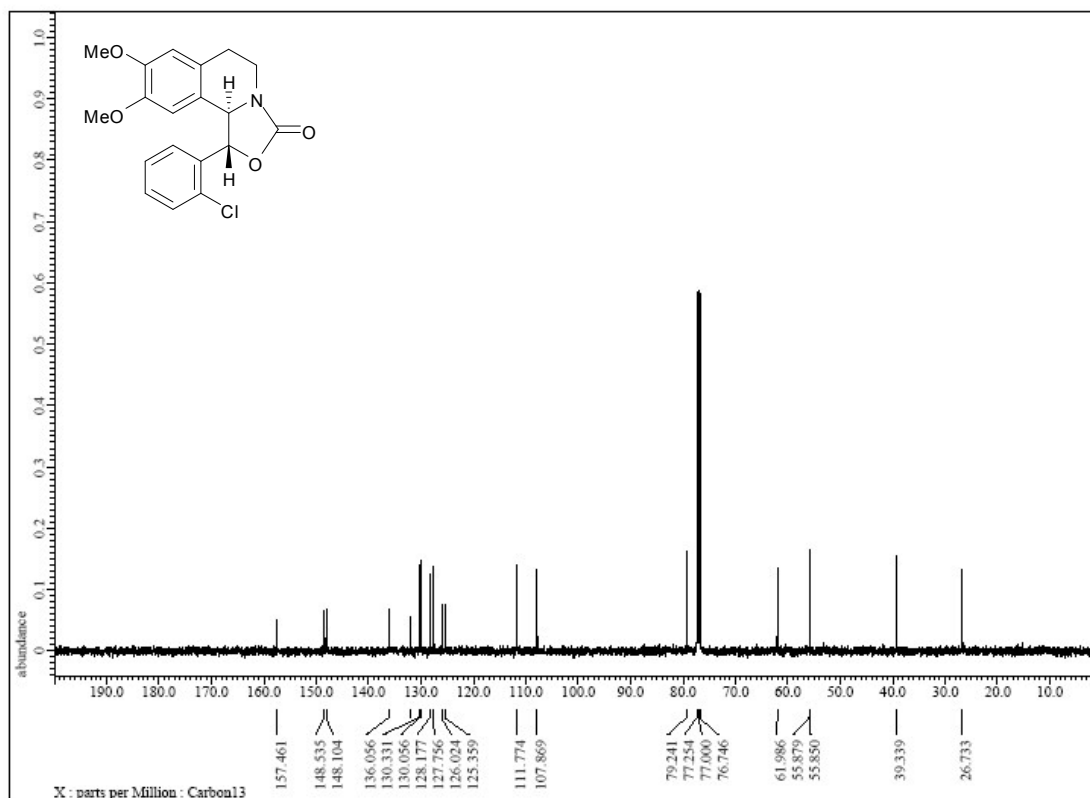

<sup>13</sup>C NMR (CDCl<sub>3</sub>, 125 MHz) spectrum of **15**

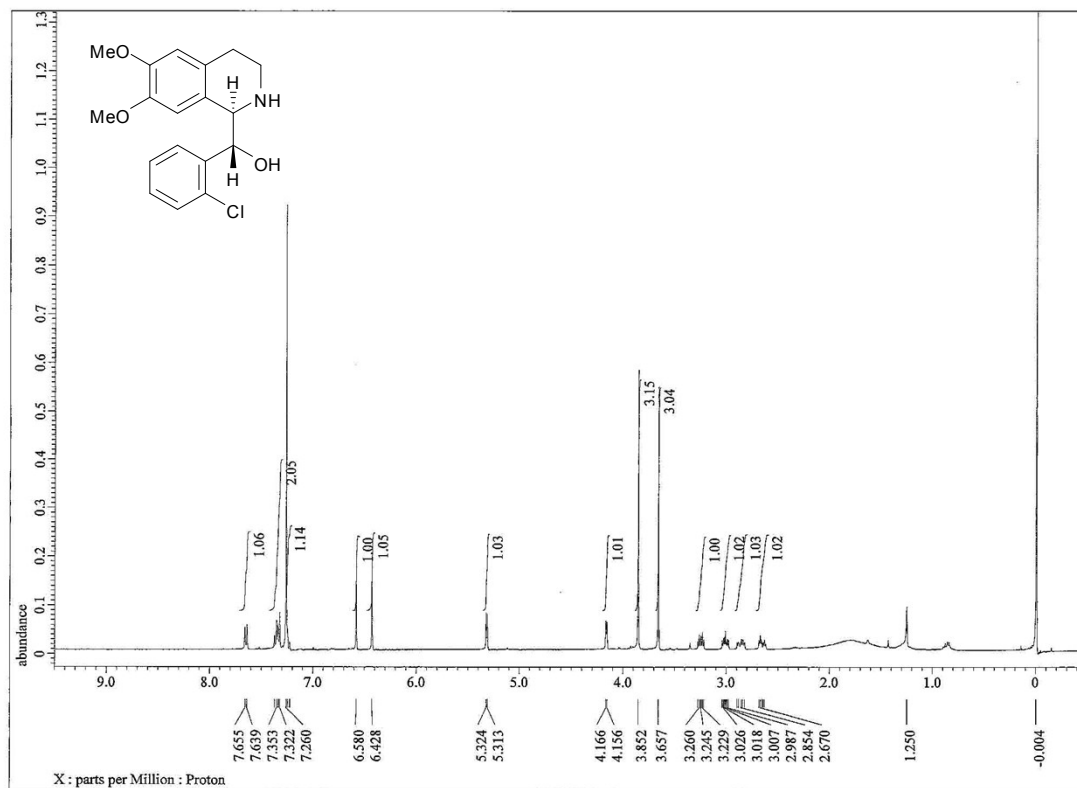

<sup>1</sup>H NMR (CDCl<sub>3</sub>, 400 MHz) spectrum of 4

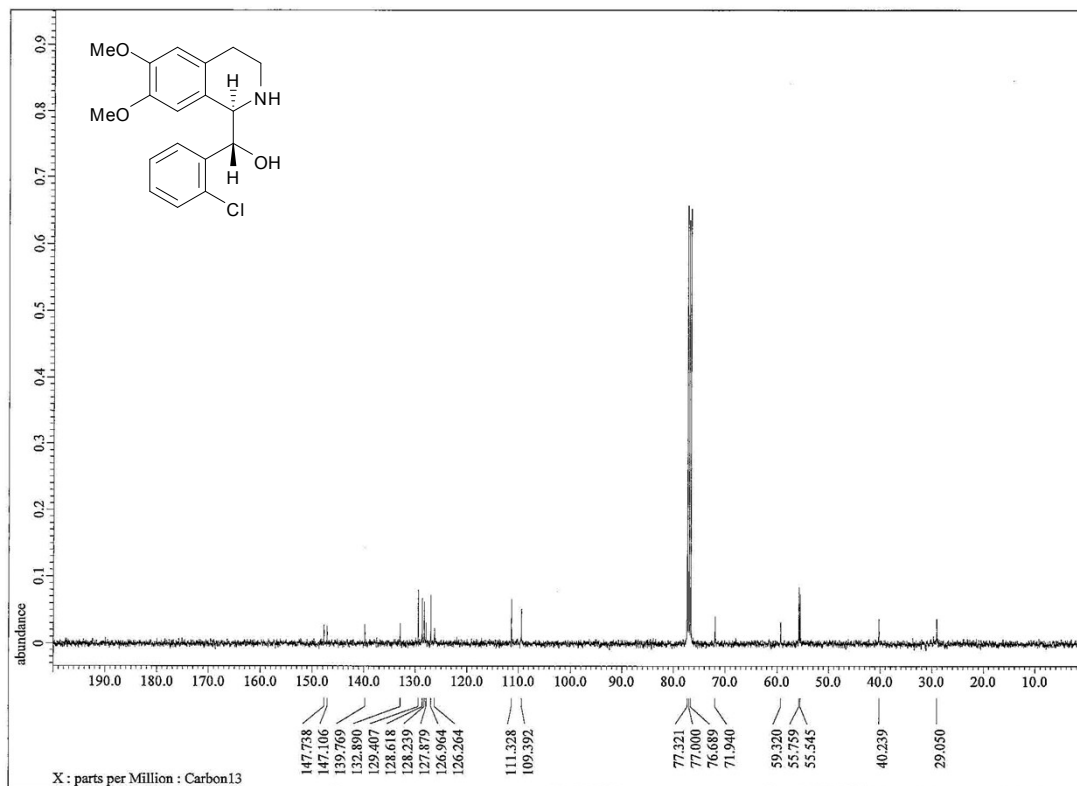

<sup>13</sup>C NMR (CDCl<sub>3</sub>, 100 MHz) spectrum of 4

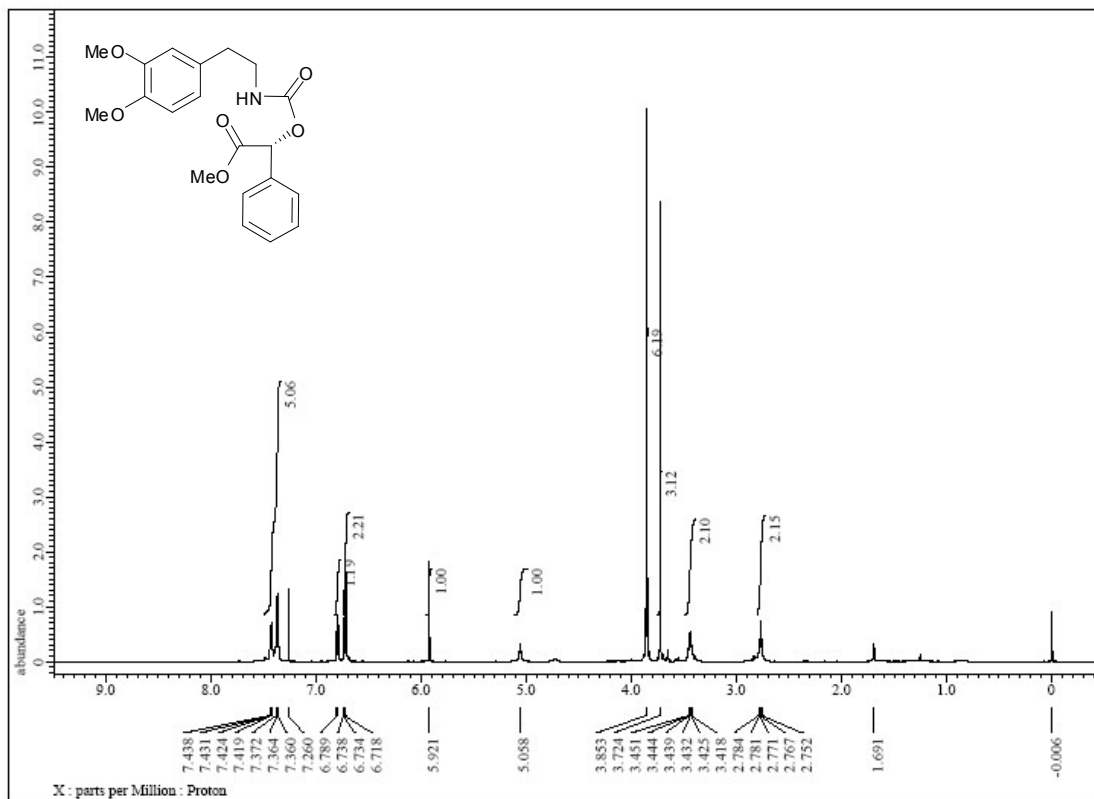

<sup>1</sup>H NMR (CDCl<sub>3</sub>, 500 MHz) spectrum of **19**

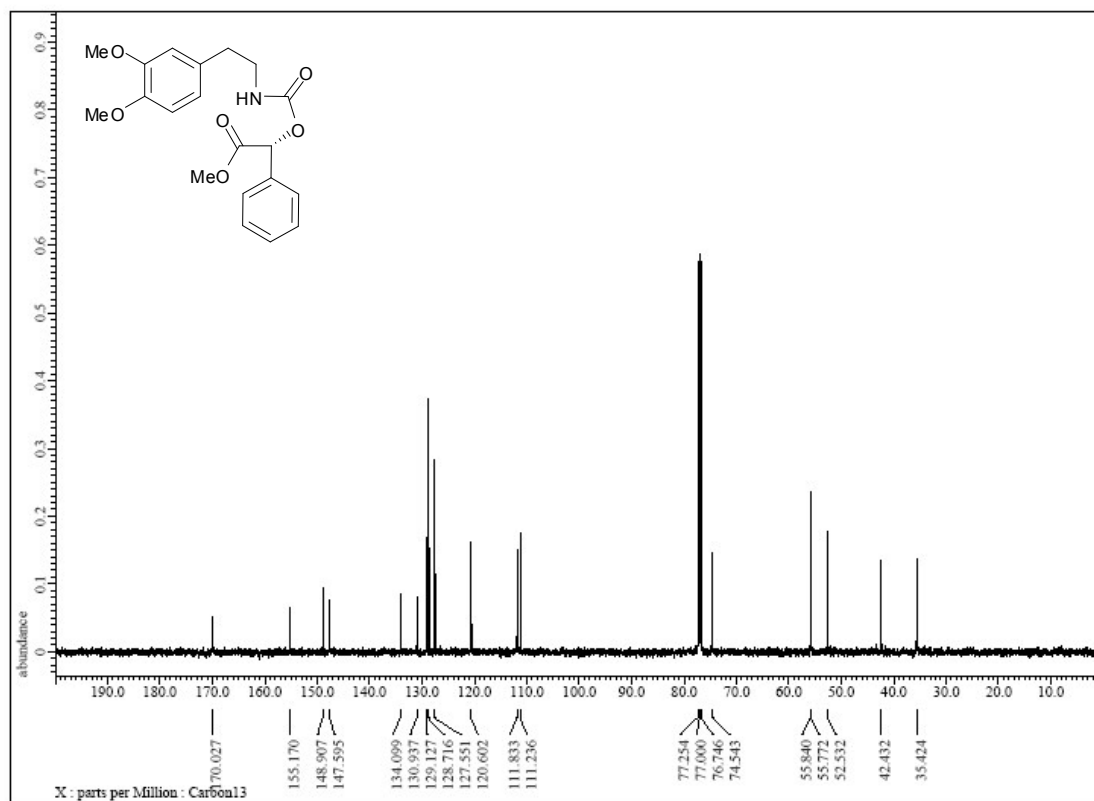

<sup>13</sup>C NMR (CDCl<sub>3</sub>, 125 MHz) spectrum of **19**

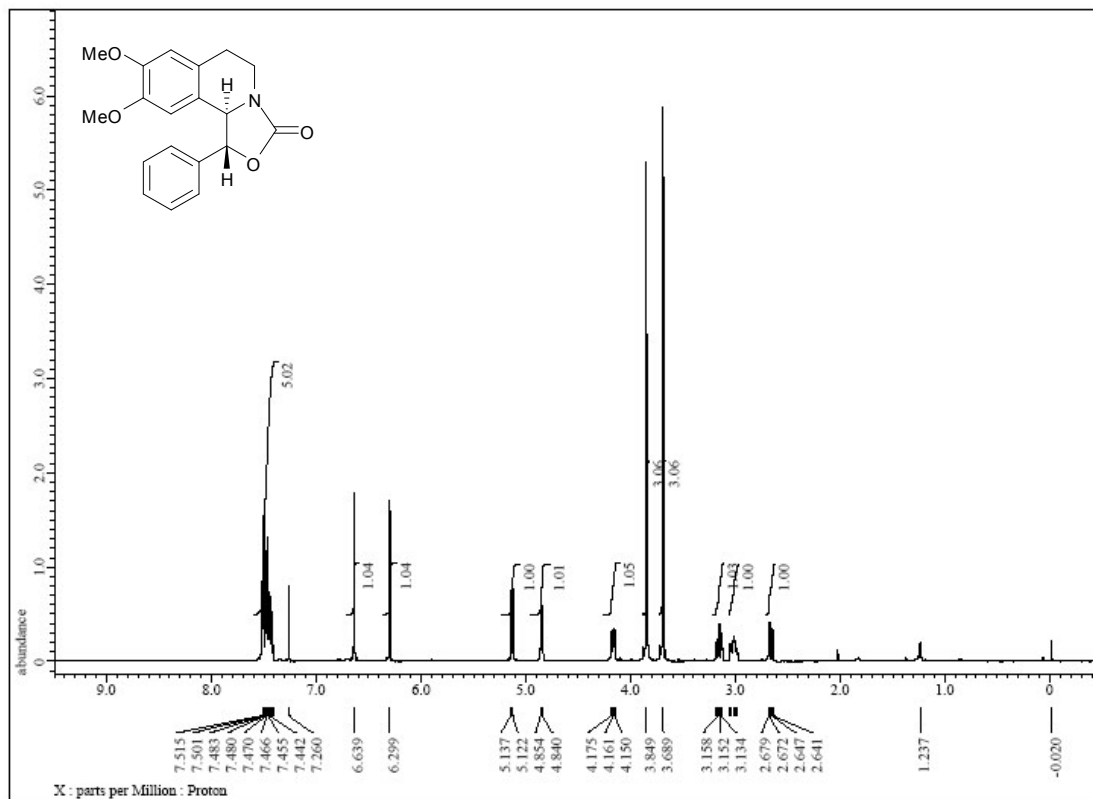

<sup>1</sup>H NMR (CDCl<sub>3</sub>, 500 MHz) spectrum of **20**

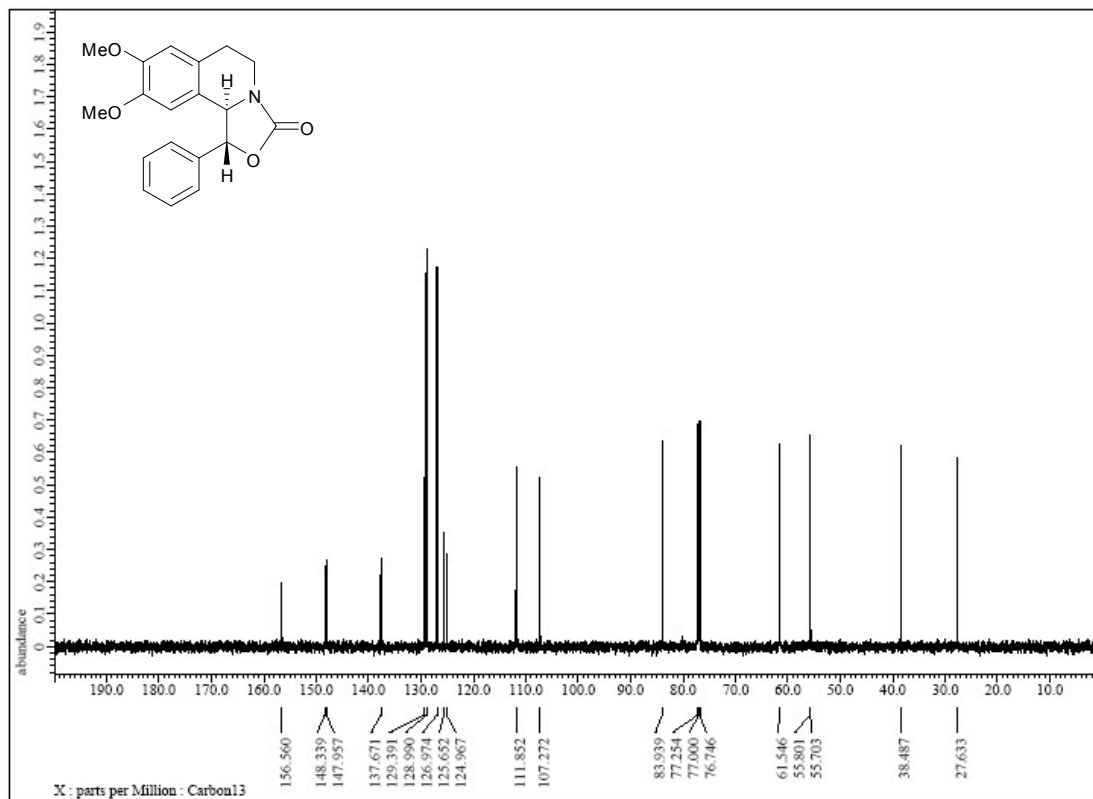

<sup>13</sup>C NMR (CDCl<sub>3</sub>, 125 MHz) spectrum of **20**

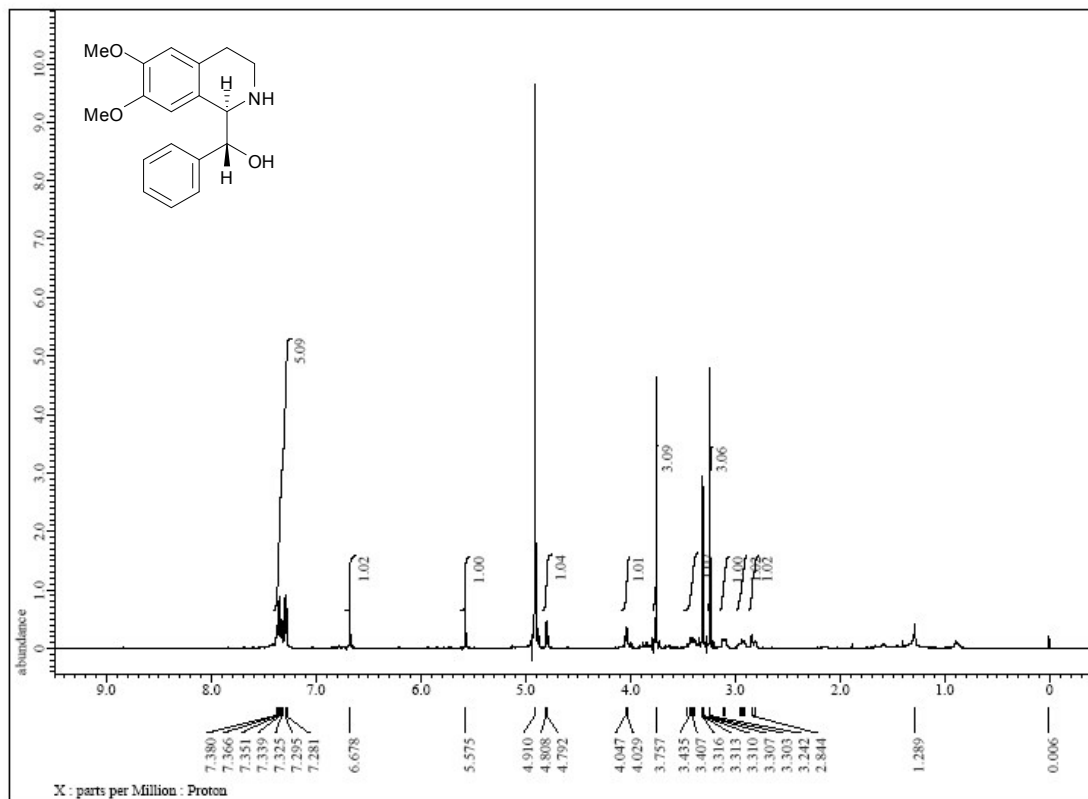

<sup>1</sup>H NMR (CD<sub>3</sub>OD, 500 MHz) spectrum of **5**

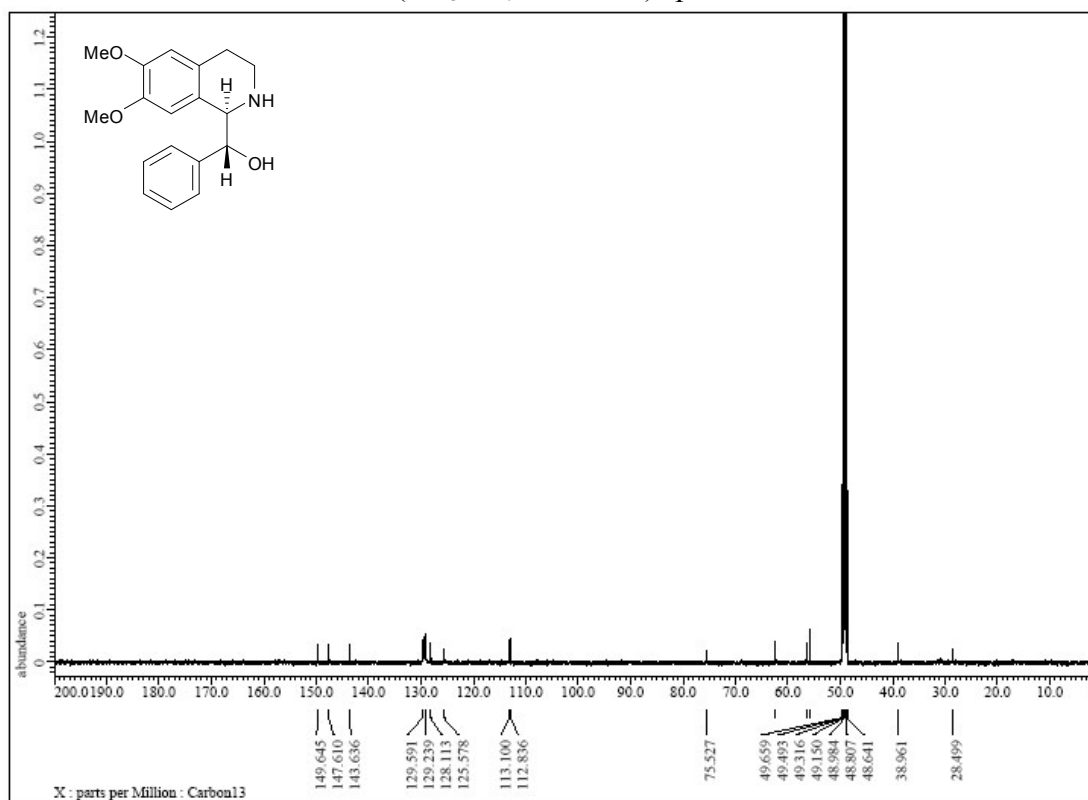

<sup>13</sup>C NMR (CD<sub>3</sub>OD, 125 MHz) spectrum of **5**

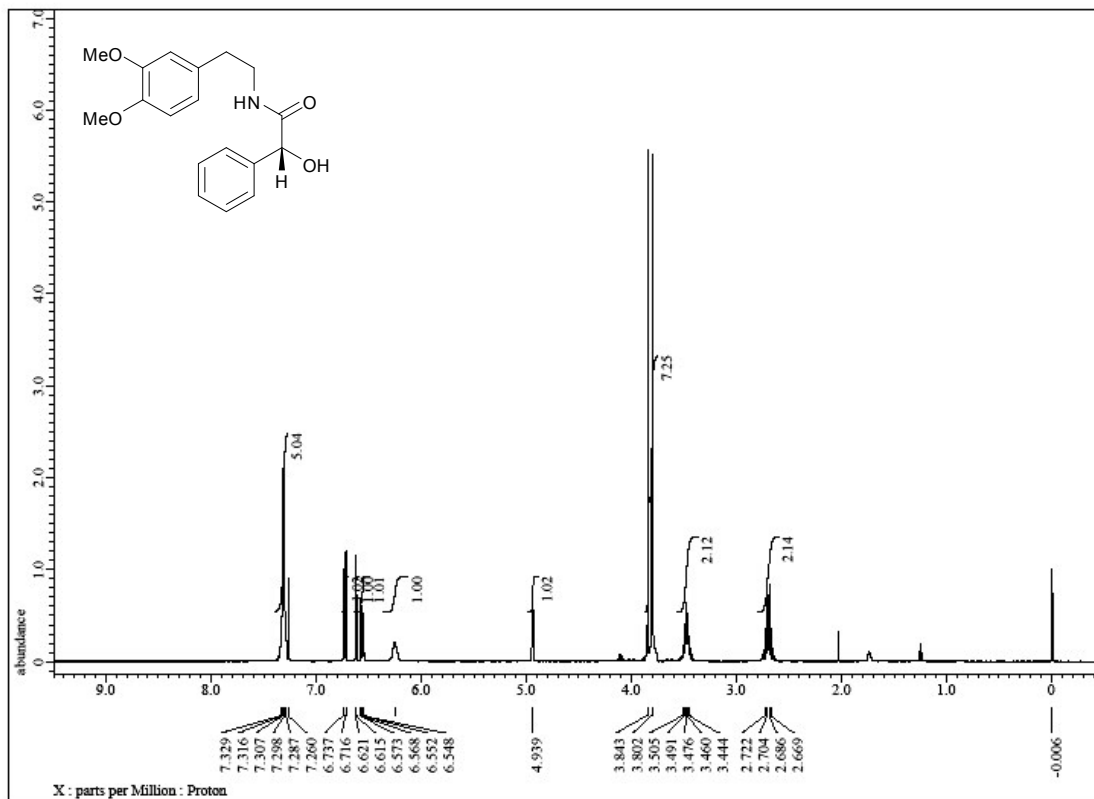

<sup>1</sup>H NMR (CDCl<sub>3</sub>, 400 MHz) spectrum of **21**

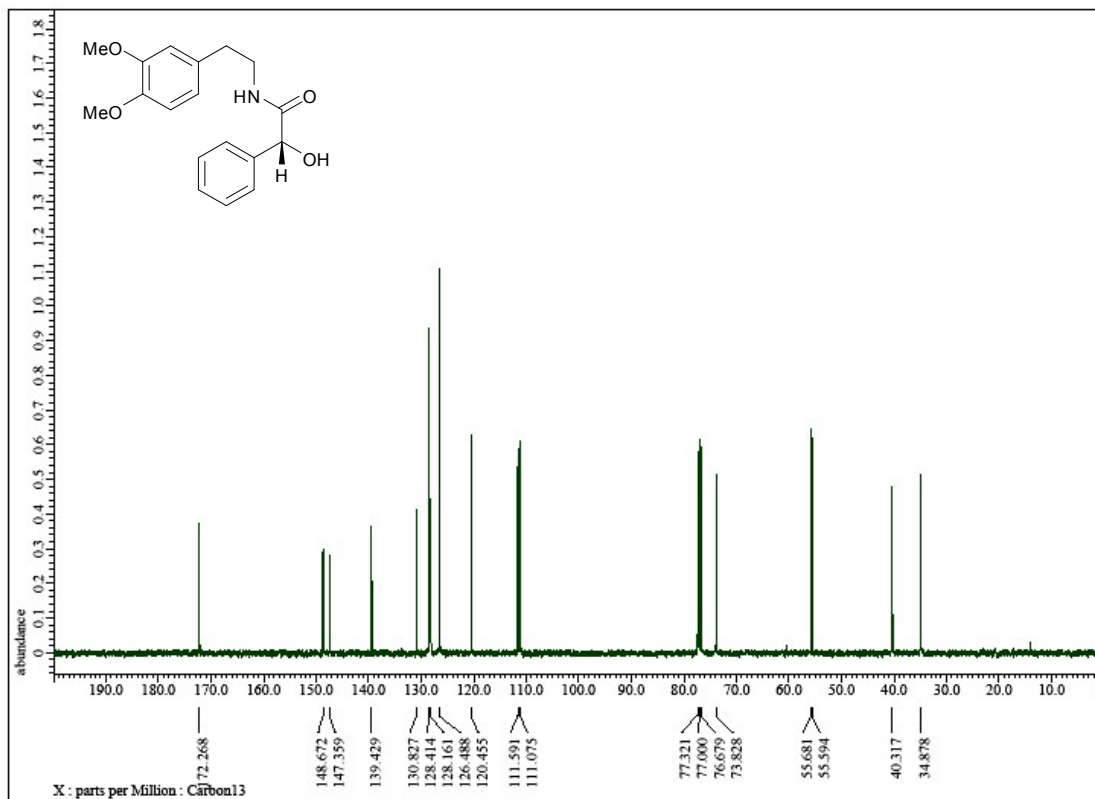

<sup>13</sup>C NMR (CDCl<sub>3</sub>, 100 MHz) spectrum of **21**



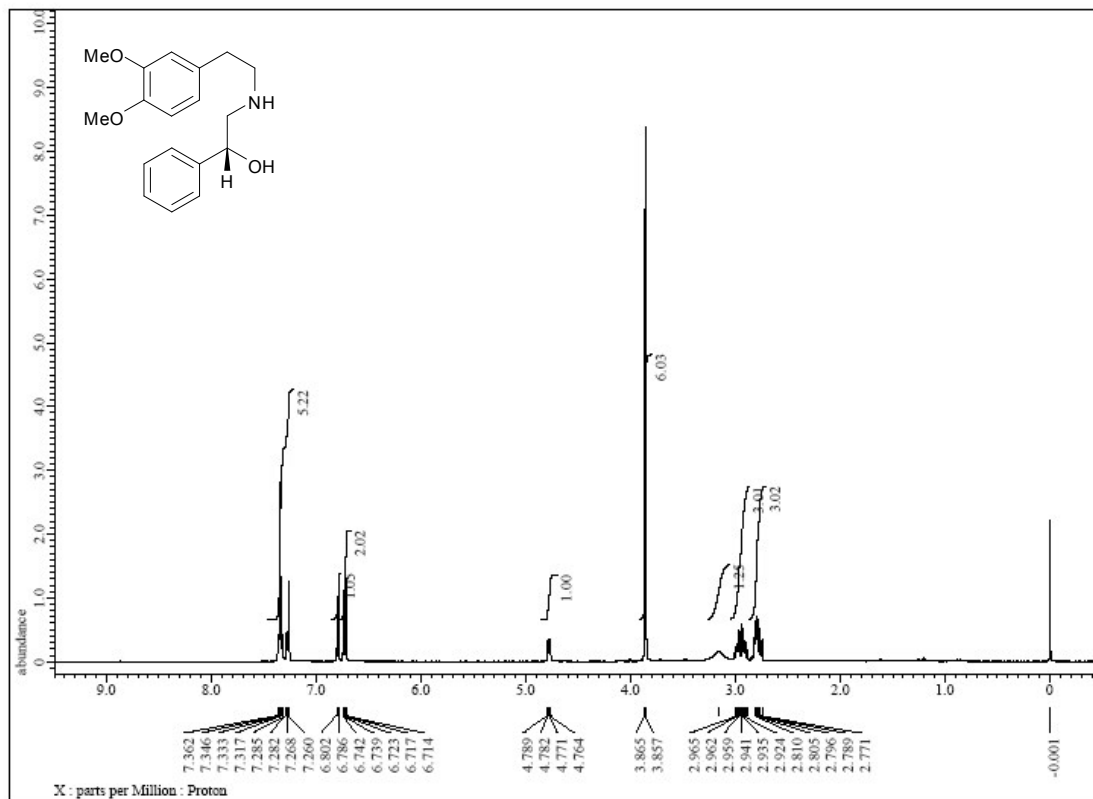

<sup>1</sup>H NMR (CDCl<sub>3</sub>, 500 MHz) spectrum of **6**

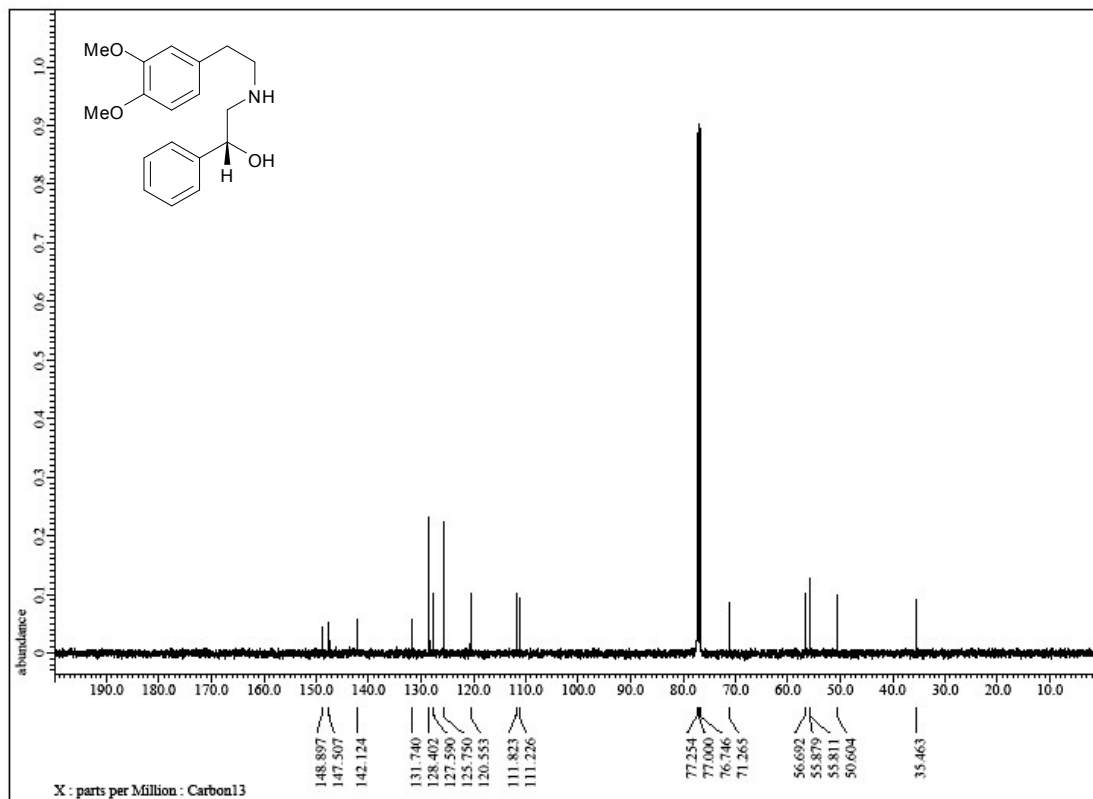

<sup>13</sup>C NMR (CDCl<sub>3</sub>, 125 MHz) spectrum of **6**
